# Supplementary material for: The Great Oxygenation Event as a consequence of ecological dynamics modulated by planetary change
Source: PubMed Central journal article supplement (PMC8238953; doi:10.1038/s41467-021-23286-7), 2021-06-28
Supplement: 41467_2021_23286_MOESM1_ESM.pdf [file 41467_2021_23286_MOESM1_ESM.pdf]

Supplementary Information:  
**The Great Oxygenation Event as a  
consequence of ecological dynamics  
modulated by planetary change**

Jason Olejarz<sup>1</sup>, Yoh Iwasa<sup>2</sup>, Andrew H. Knoll<sup>1</sup>, Martin A. Nowak<sup>1,3</sup>

<sup>1</sup>Department of Organismic and Evolutionary Biology, Harvard University,  
Cambridge, MA 02138, USA

<sup>2</sup>Department of Bioscience, School of Science and Technology, Kwansai Gakuin University,  
Sanda-shi, Hyogo, Japan

<sup>3</sup>Department of Mathematics, Harvard University, Cambridge, MA 02138, USA

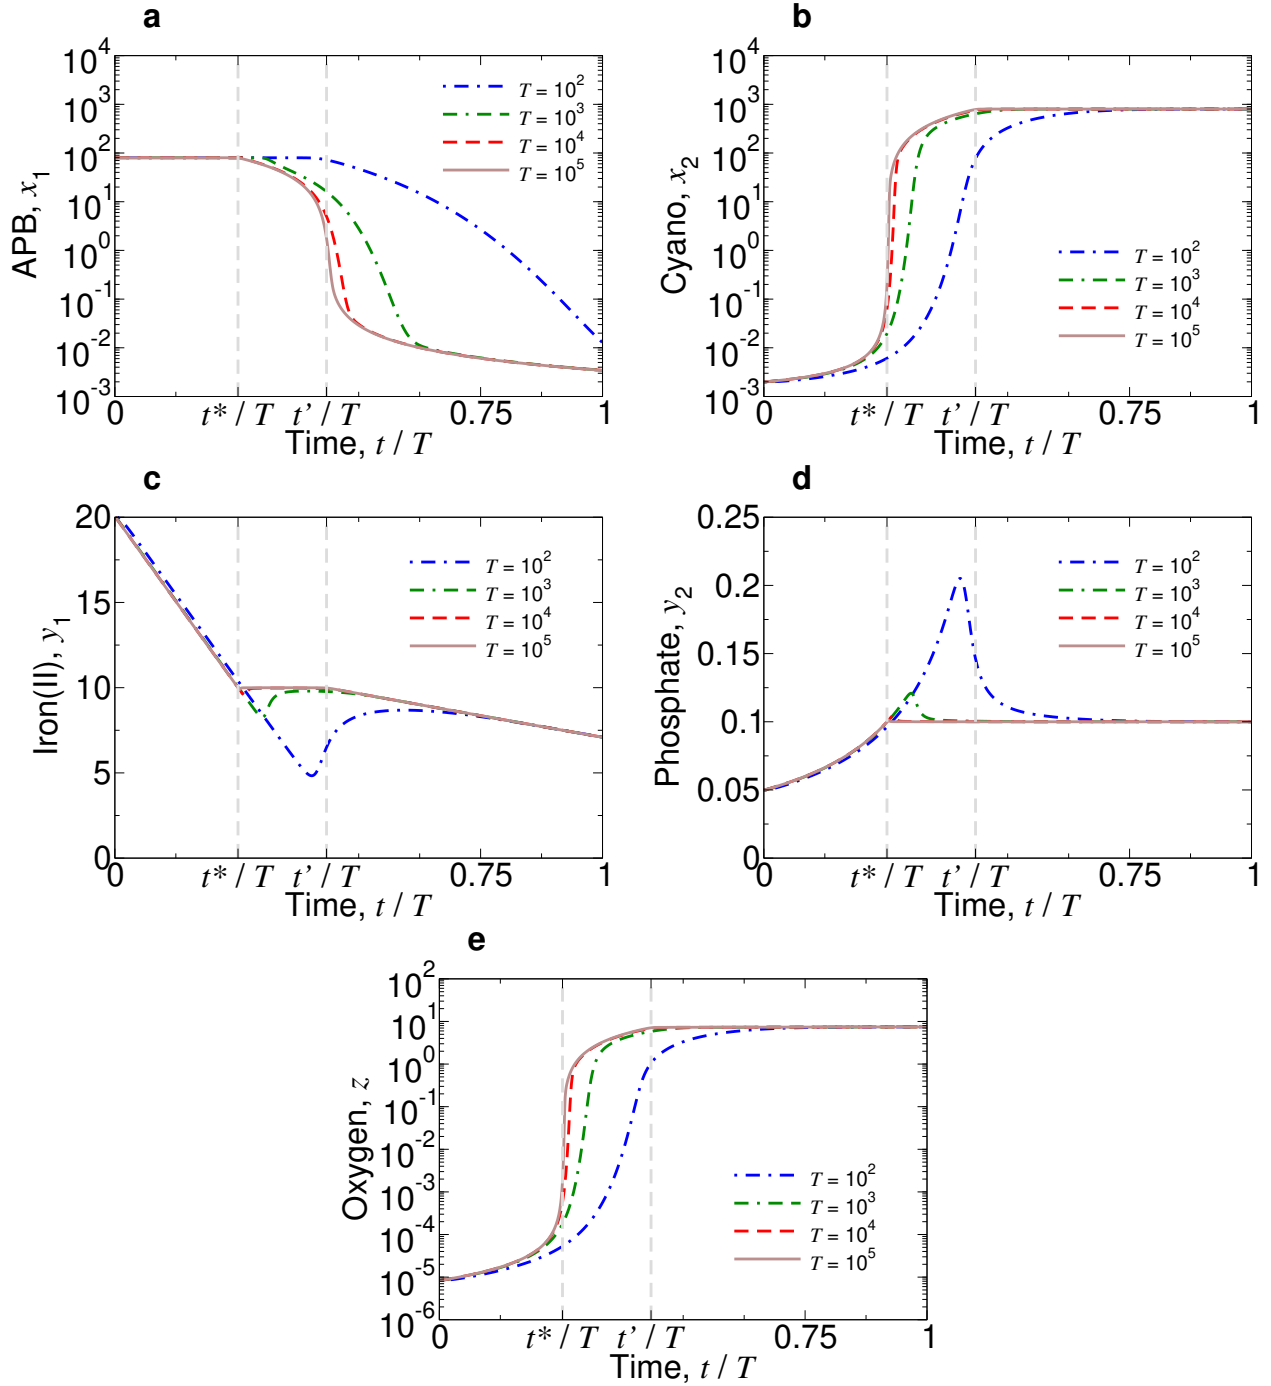

**Fig. S1:** If the planet changes slowly relative to the timescale of bacterial reproduction and death, then at any given time, SI Equations (8) are approximately in steady state. A continuous transition is shown. We simulate SI Equations (8) with  $\alpha_1 = \alpha_2 = \beta_1 = \beta_2 = 1$  from time  $t = 0$  until time  $t = T$ . We set  $f_2 = 80$ ,  $c = 10$ ,  $a = 10$ ,  $b = 100$ , and  $u_1 = u_2 = 10^{-3}$ , and we set  $f_1 = 100 - 40(t/T)$ .  $t^*$  denotes the time at which Equilibrium  $E_1$  loses stability in the limit  $T \rightarrow \infty$ , and  $t'$  denotes the time at which Equilibrium  $E_2$  gains stability in the limit  $T \rightarrow \infty$ . We plot the abundances of APB (a), cyanobacteria (b), iron(II) (c), phosphate (d), and oxygen (e).

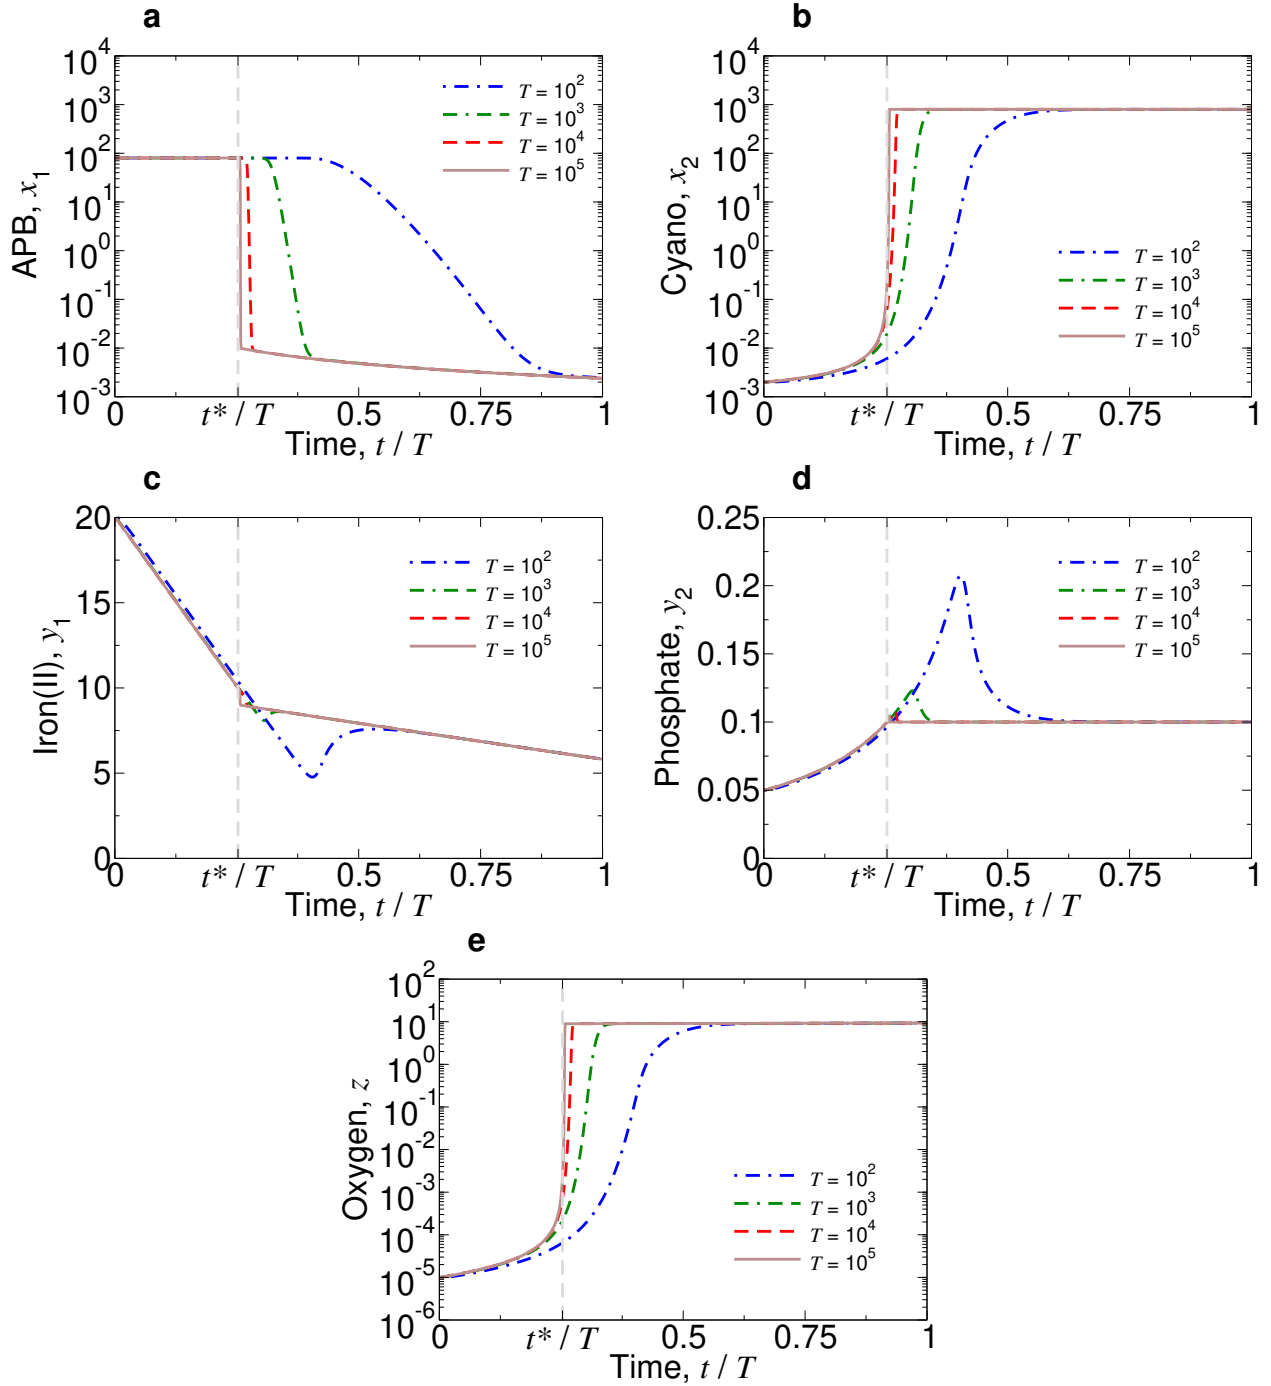

**Fig. S2:** If the planet changes slowly relative to the timescale of bacterial reproduction and death, then at any given time, SI Equations (8) are approximately in steady state. A discontinuous transition is shown. We simulate SI Equations (8) with  $\alpha_1 = \alpha_2 = \beta_1 = \beta_2 = 1$  from time  $t = 0$  until time  $t = T$ . We set  $f_2 = 80$ ,  $c = 10$ ,  $a = 10$ ,  $b = 80$ , and  $u_1 = u_2 = 10^{-3}$ , and we set  $f_1 = 100 - 40(t/T)$ .  $t^*$  denotes the time at which a rapid transition occurs in the limit  $T \rightarrow \infty$ . We plot the abundances of APB (a), cyanobacteria (b), iron(II) (c), phosphate (d), and oxygen (e).

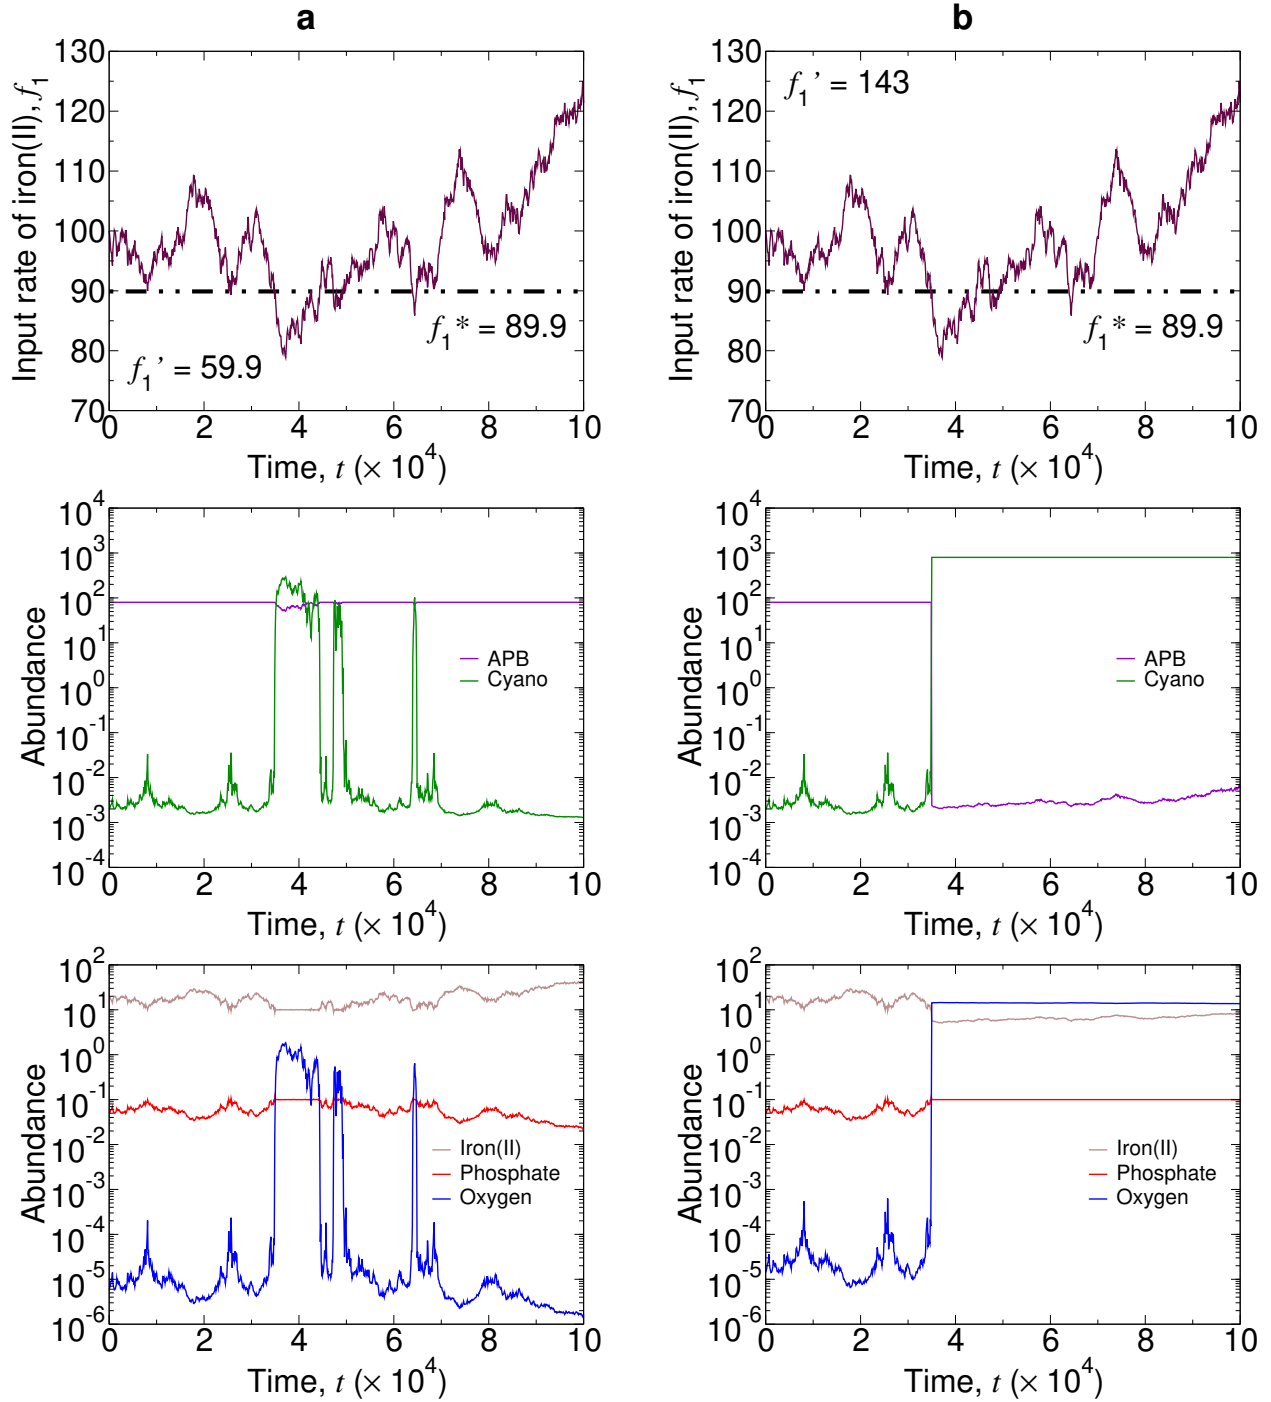

**Fig. S3: Whether or not oxygenation is reversible depends on the burial rate of oxygen.** Equilibrium  $E_1$  (APB dominate) is stable for  $f_1 > f_1^*$  and unstable for  $f_1 < f_1^*$ . We simulate SI Equations (8) with  $\alpha_1 = \alpha_2 = \beta_1 = \beta_2 = 1$ , and we set  $f_2 = 80$ ,  $c = 10$ ,  $a = 10$ , and  $u_1 = u_2 = 10^{-3}$ . **a.** For large values of  $b$ , oxygenation is readily reversed. We set  $b = 150$ . Since  $f_1 > f_1'$ , Equilibrium  $E_2$  (cyanobacteria dominate) is unstable. **b.** For small values of  $b$ , oxygenation is robust to moderate amounts of geophysical change. We set  $b = 50$ . Since  $f_1 < f_1'$ , Equilibrium  $E_2$  is stable.

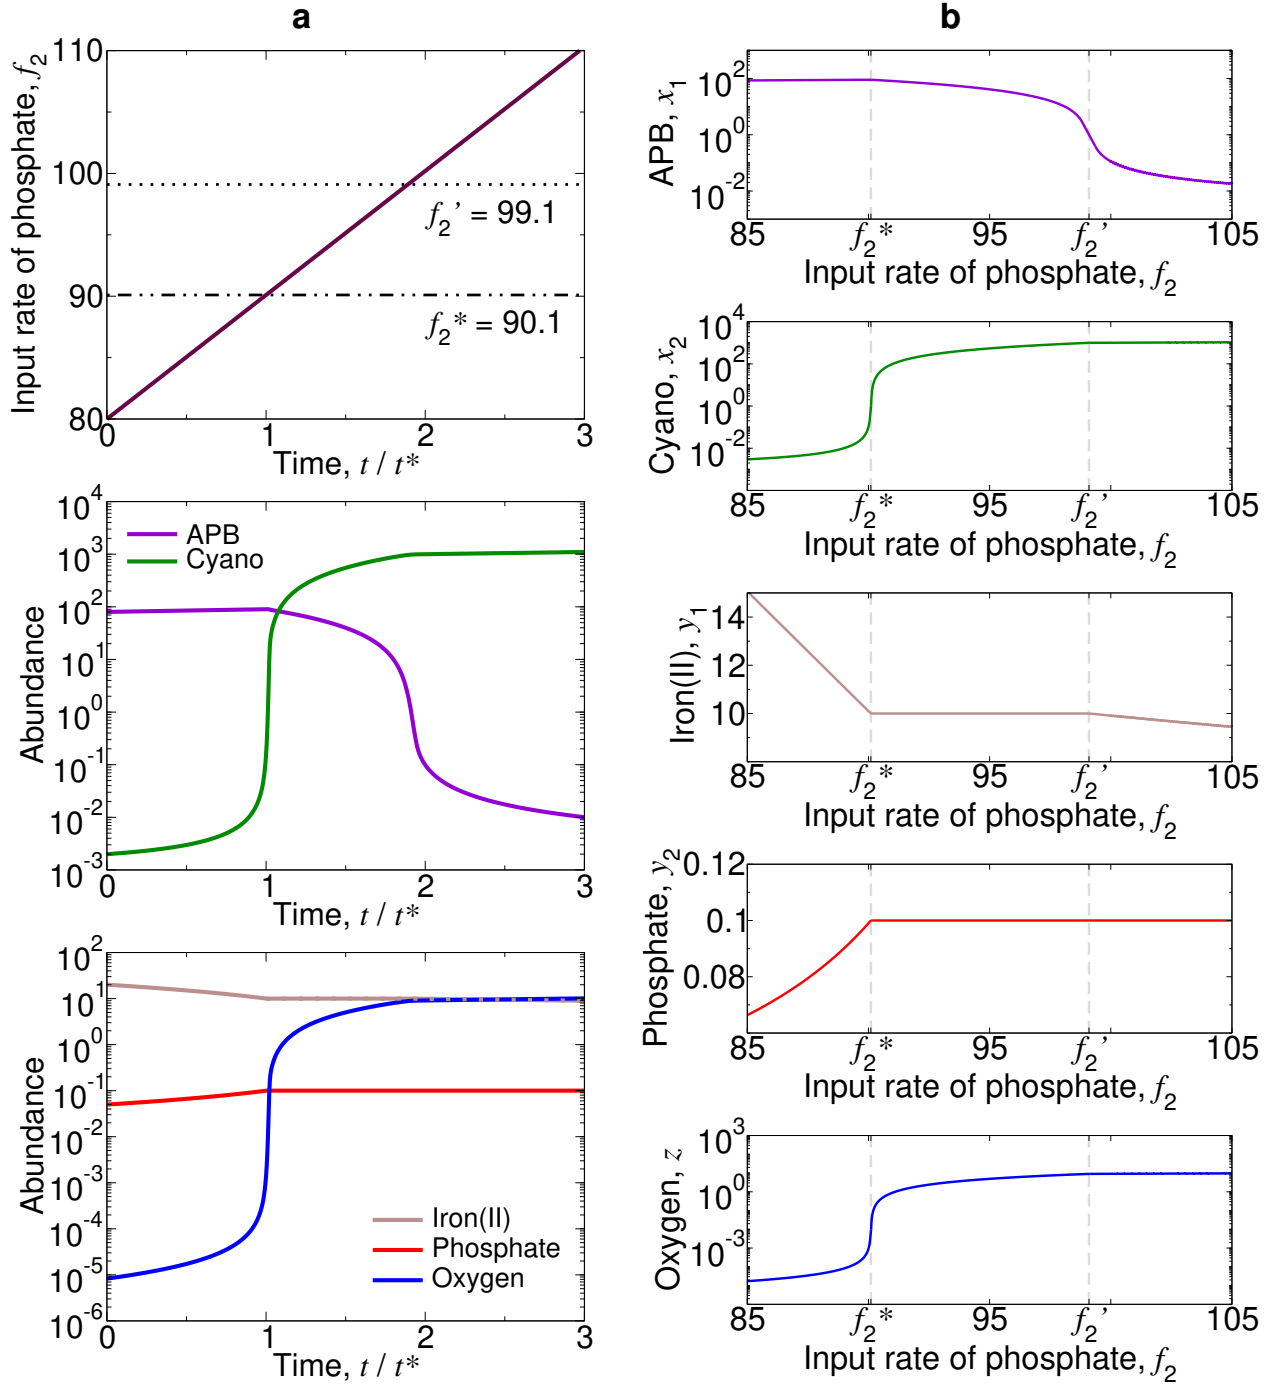

**Fig. S4:** The GOE can be triggered by a rise in the influx of phosphate and is gradual if  $b > c(a - 1)$ . Equilibrium  $E_1$  (APB dominate) loses stability and Equilibrium  $E_2$  (cyanobacteria dominate) gains stability when  $f_2$  rises above  $f_2^*$  and  $f_2'$ , respectively. We set  $f_1 = 100$ ,  $c = 10$ ,  $a = 10$ ,  $b = 100$ , and  $u_1 = u_2 = 10^{-3}$ . **a.** We simulate **SI** Equations (8) with  $\alpha_1 = \alpha_2 = \beta_1 = \beta_2 = 1$ , and we set  $f_2 = 80 + 40(t/10^5)$ .  $t^*$  denotes the time at which Equilibrium  $E_1$  loses stability. **b.** There is stable coexistence of both types of bacteria for  $f_2^* < f_2 < f_2'$ .

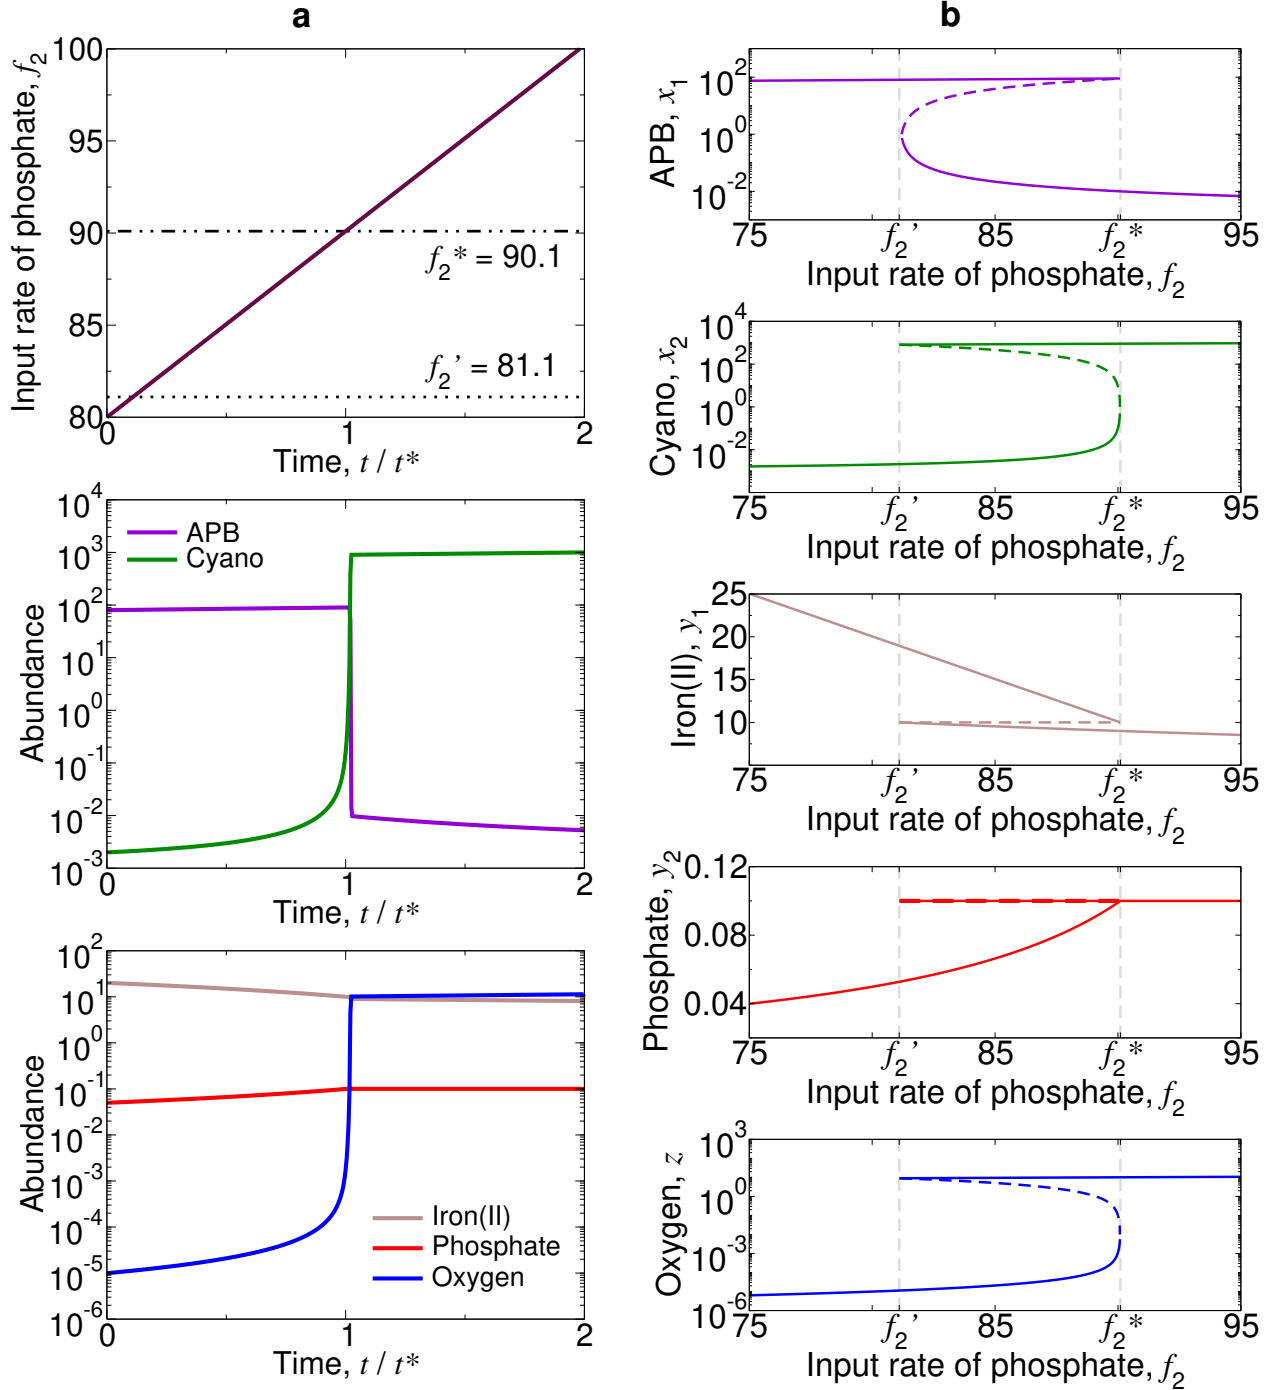

**Fig. S5: The GOE can be triggered by a rise in the influx of phosphate and is sudden if  $b < c(a - 1)$ .** Equilibrium  $E_2$  (cyanobacteria dominate) gains stability and Equilibrium  $E_1$  (APB dominate) loses stability when  $f_2$  rises above  $f_2'$  and  $f_2^*$ , respectively. We set  $f_1 = 100$ ,  $c = 10$ ,  $a = 10$ ,  $b = 80$ , and  $u_1 = u_2 = 10^{-3}$ . **a.** We simulate SI Equations (8) with  $\alpha_1 = \alpha_2 = \beta_1 = \beta_2 = 1$ , and we set  $f_2 = 80 + 40(t/10^5)$ .  $t^*$  denotes the time at which Equilibrium  $E_1$  loses stability. **b.** Bifurcation plots reveal bistability for  $f_2' < f_2 < f_2^*$ .

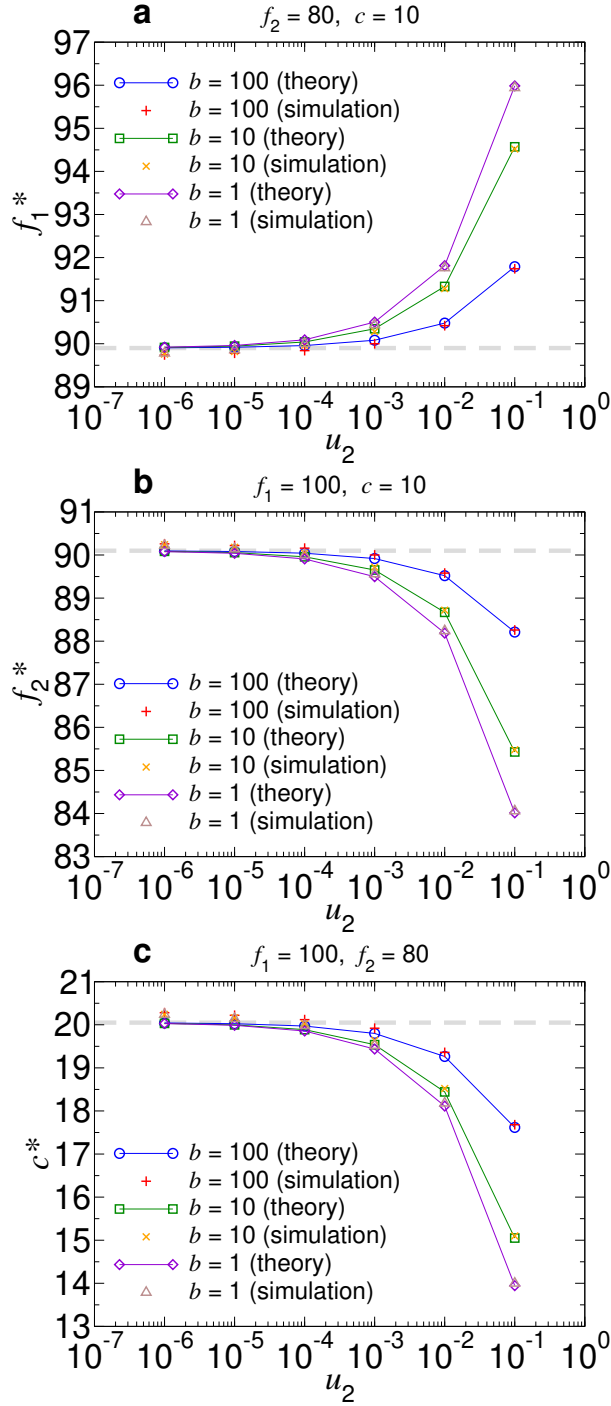

**Fig. S6:** For small values of  $u_2$ , small values of  $a$ , and large values of  $b$ , the critical values of  $f_1$ ,  $f_2$ , and  $c$  for triggering a GOE converge to the values given by SI Equations (28), (30), and (32), respectively. We set  $a = 100$  and  $u_1 = 10^{-3}$ . We plot  $f_1^*$  (a),  $f_2^*$  (b), and  $c^*$  (c). The simulational values of  $f_1^*$ ,  $f_2^*$ , and  $c^*$  are obtained from numerical integration of SI Equations (8) with  $\alpha_1 = \alpha_2 = \beta_1 = \beta_2 = 1$ . The theoretical values of  $f_1^*$ ,  $f_2^*$ , and  $c^*$  are solutions to SI Equations (38), (39), and (40), respectively. The lines between the data points from SI Equations (38), (39), and (40) are a guide for the eye.

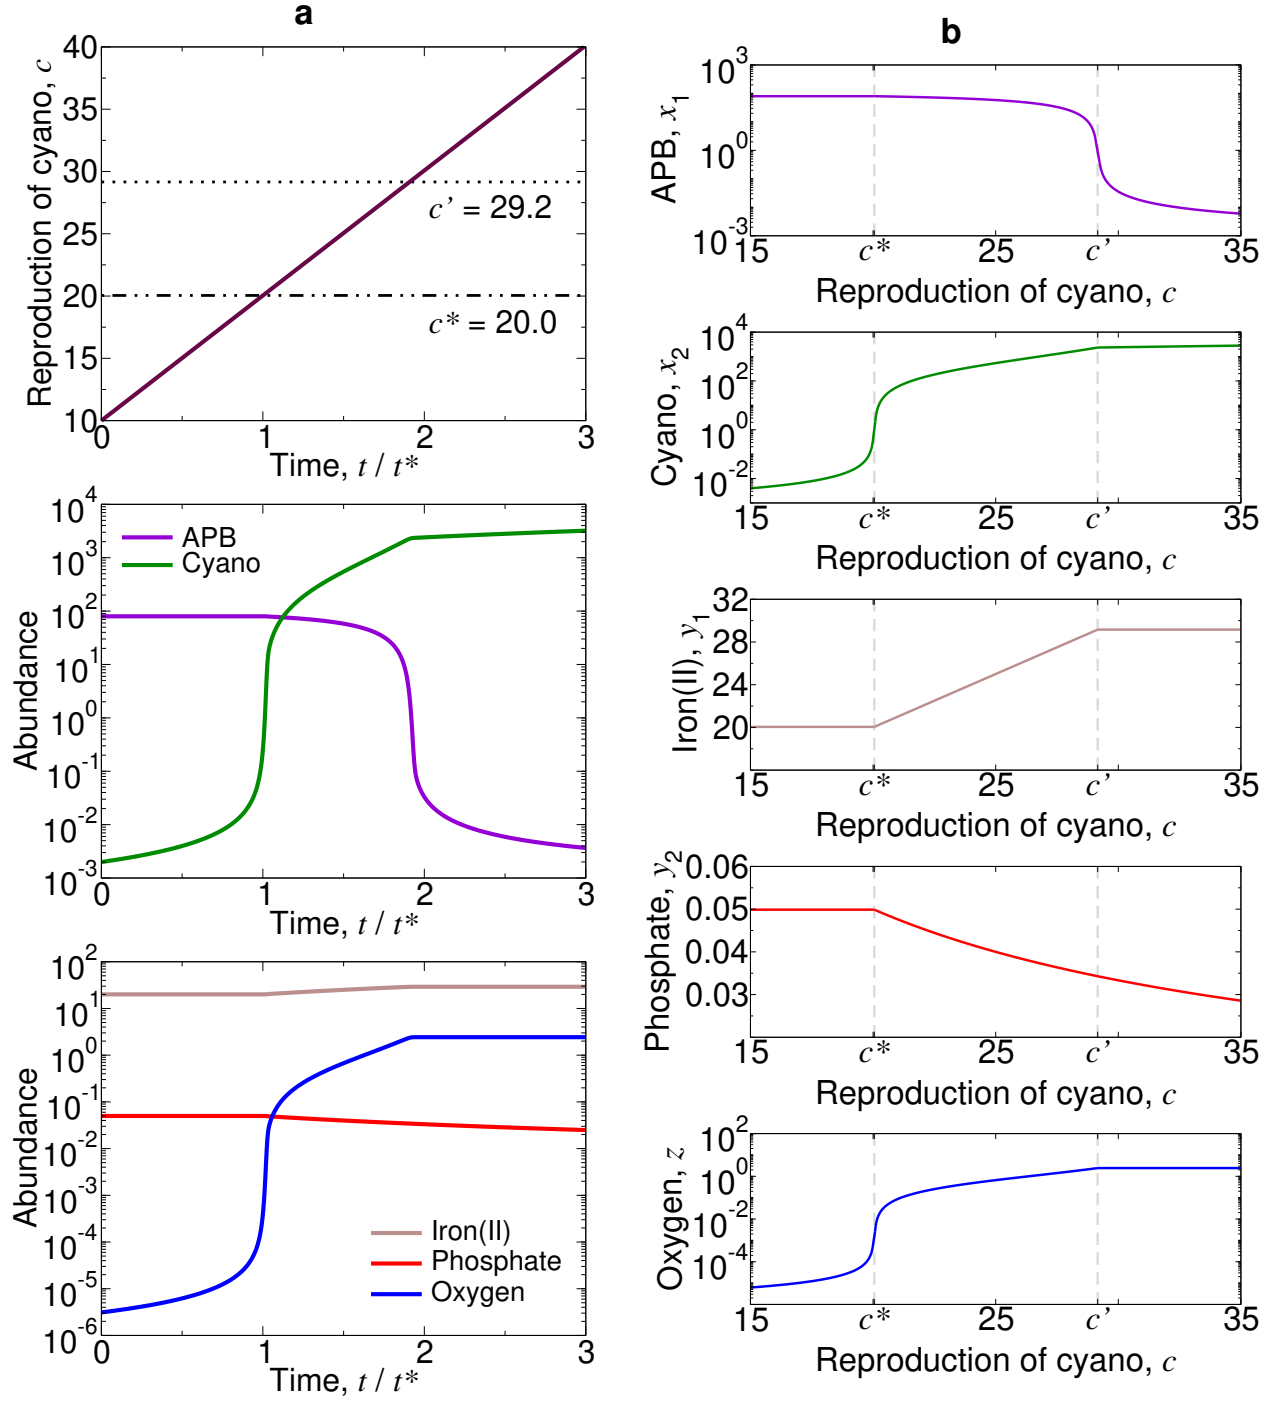

**Fig. S7: The GOE can be triggered by a rise in the reproductive rate of cyanobacteria and is gradual if  $b > c(a - 1)$  when  $c$  becomes greater than  $c^*$ .** Equilibrium  $E_1$  (APB dominate) loses stability and Equilibrium  $E_2$  (cyanobacteria dominate) gains stability when  $c$  rises above  $c^*$  and  $c'$ , respectively. We set  $f_1 = 100$ ,  $f_2 = 80$ ,  $a = 10$ ,  $b = 300$ , and  $u_1 = u_2 = 10^{-3}$ . **a.** We simulate SI Equations (8) with  $\alpha_1 = \alpha_2 = \beta_1 = \beta_2 = 1$ , and we set  $c = 10 + 40(t/10^5)$ .  $t^*$  denotes the time at which Equilibrium  $E_1$  loses stability. **b.** There is stable coexistence of both types of bacteria for  $c^* < c < c'$ .



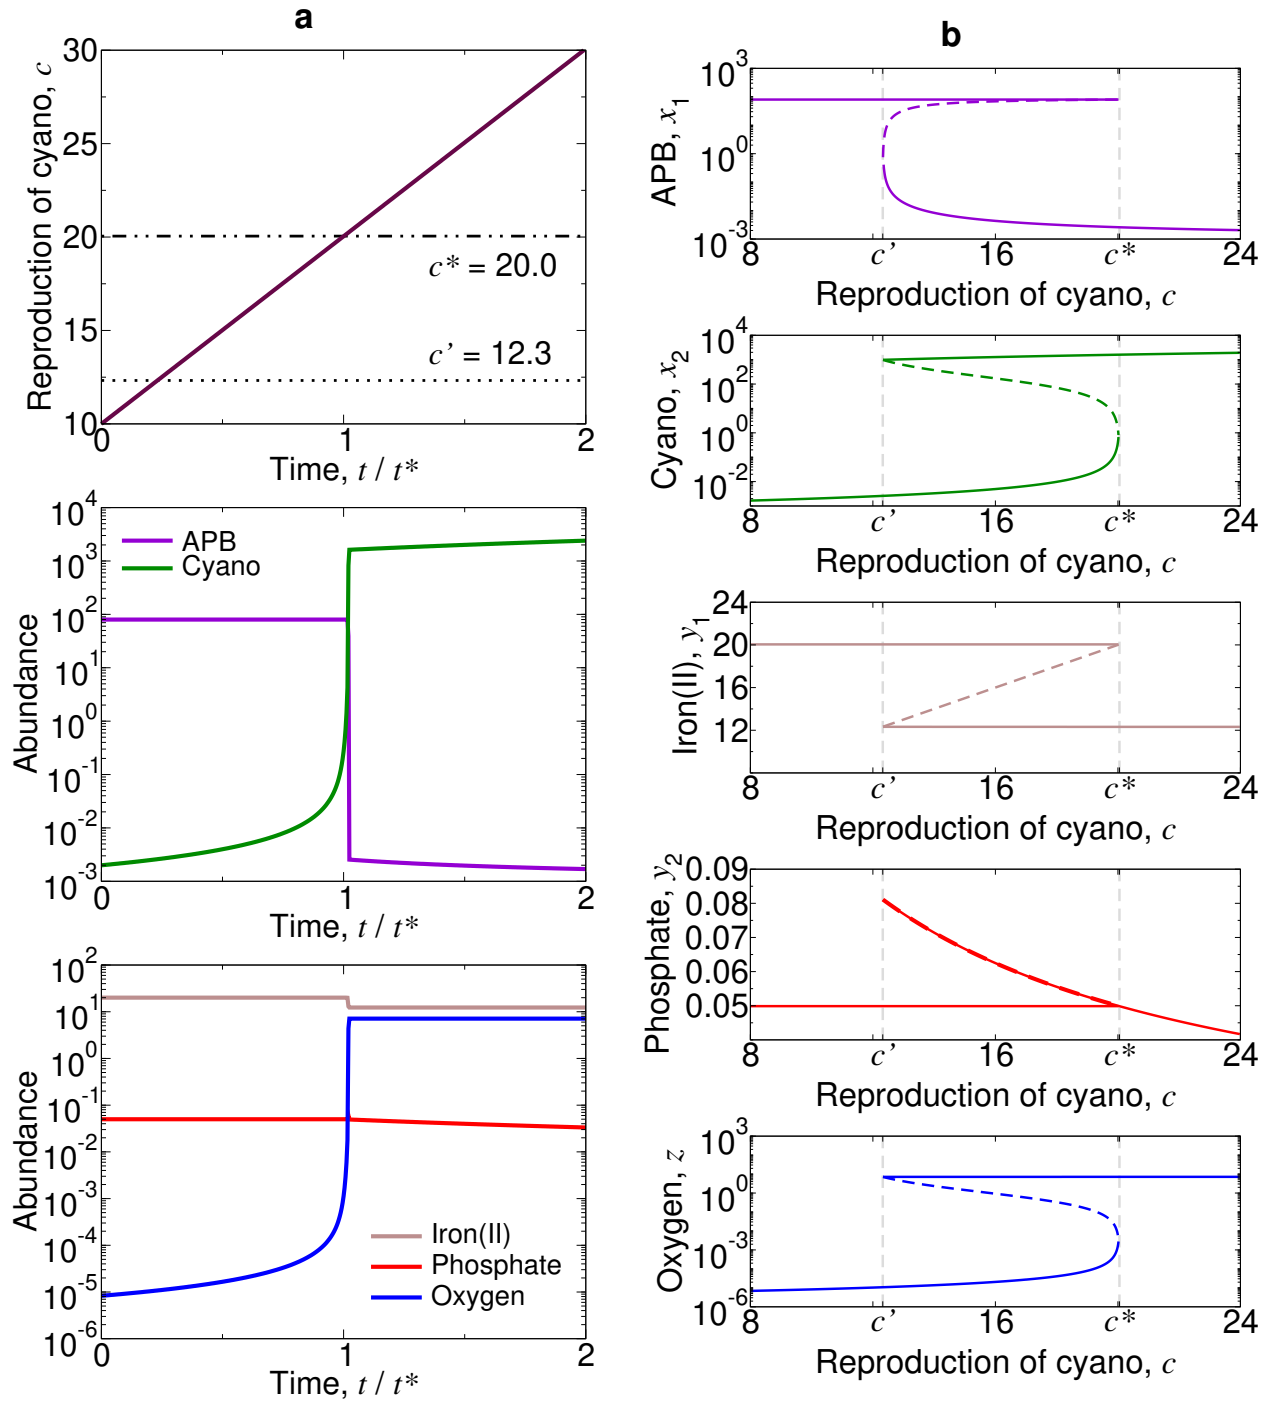

**Fig. S8: The GOE can be triggered by a rise in the reproductive rate of cyanobacteria and is sudden if  $b < c(a - 1)$  when  $c$  becomes greater than  $c^*$ . Equilibrium  $E_2$  (cyanobacteria dominate) gains stability and Equilibrium  $E_1$  (APB dominate) loses stability when  $c$  rises above  $c'$  and  $c^*$ , respectively. We set  $f_1 = 100$ ,  $f_2 = 80$ ,  $a = 10$ ,  $b = 100$ , and  $u_1 = u_2 = 10^{-3}$ . **a.** We simulate SI Equations (8) with  $\alpha_1 = \alpha_2 = \beta_1 = \beta_2 = 1$ , and we set  $c = 10 + 40(t/10^5)$ .  $t^*$  denotes the time at which Equilibrium  $E_1$  loses stability. **b.** Bifurcation plots reveal bistability for  $c' < c < c^*$ .**

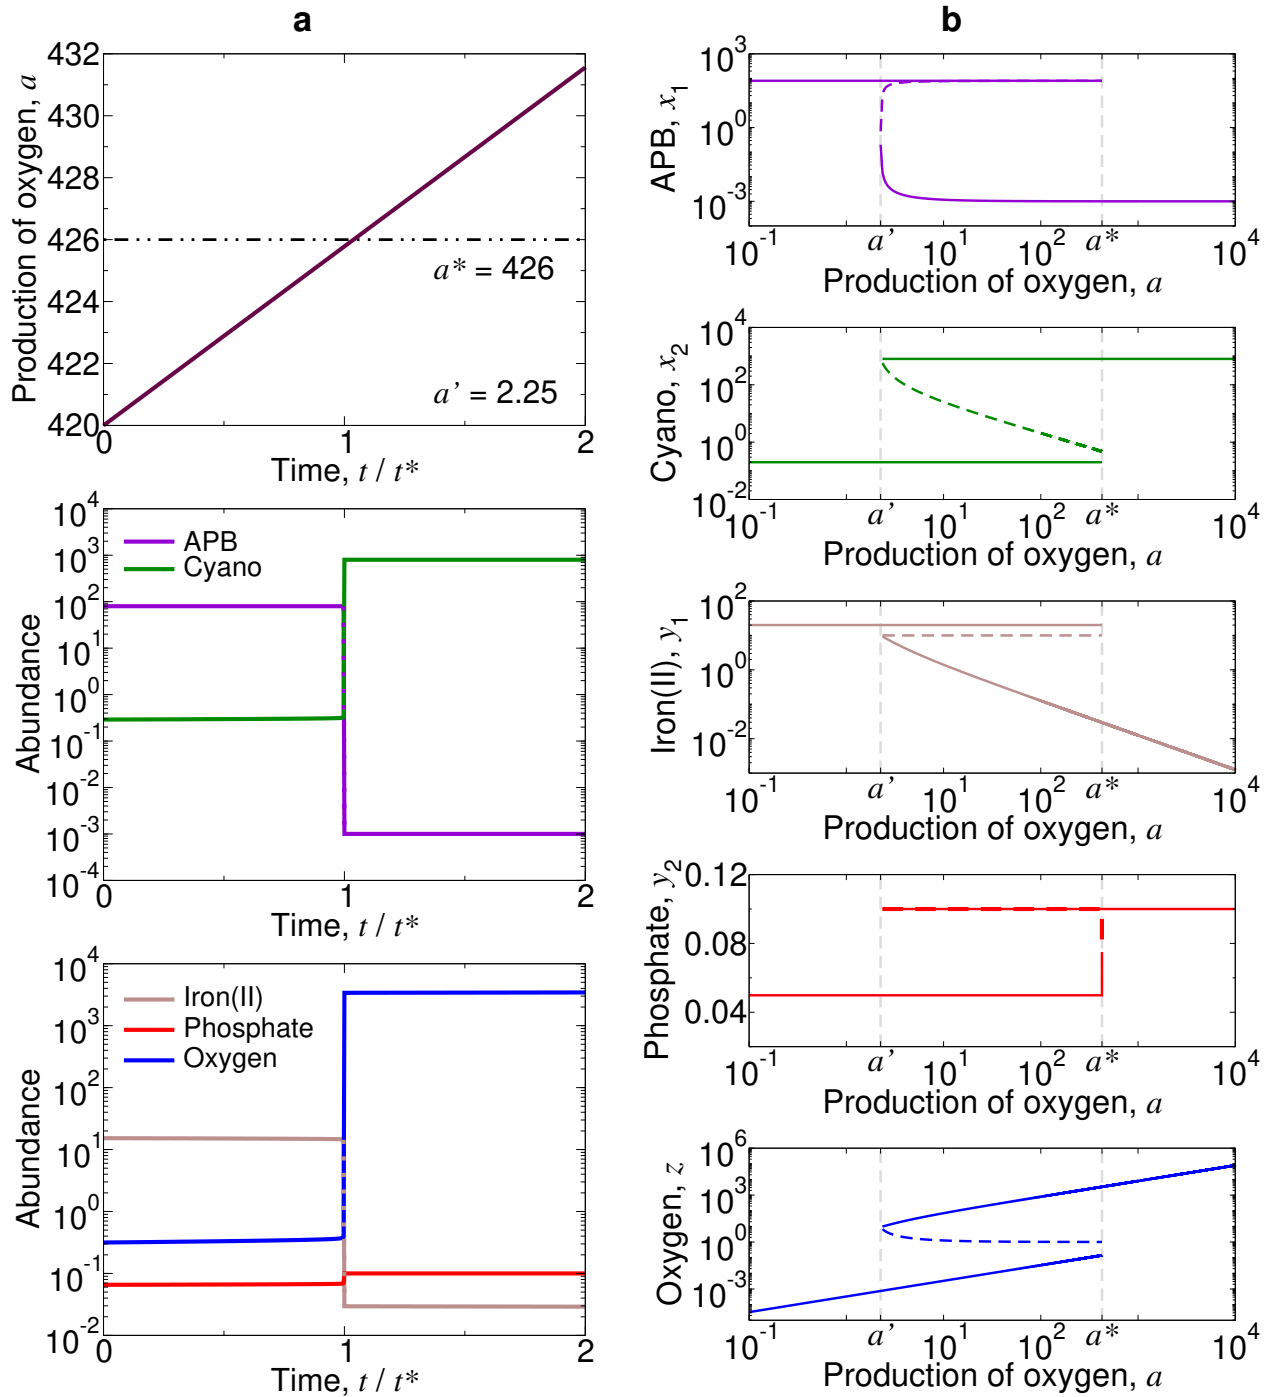

**Fig. S9: The GOE can be triggered by a rise in the production rate of oxygen.** Equilibrium  $E_2$  (cyanobacteria dominate) gains stability and Equilibrium  $E_1$  (APB dominate) ceases to exist when  $a$  rises above  $a'$  and  $a^*$ , respectively. We set  $f_1 = 100$ ,  $f_2 = 80$ ,  $c = 10$ ,  $b = 10$ ,  $u_1 = 10^{-3}$ , and  $u_2 = 0.1$ . **a.** We simulate SI Equations (8) with  $\alpha_1 = \alpha_2 = \beta_1 = \beta_2 = 1$ , and we set  $a = 420 + 20(t/10^5)$ .  $t^*$  denotes the time at which a saddle-node bifurcation occurs. **b.** Bifurcation plots reveal bistability for  $a' < a < a^*$ .

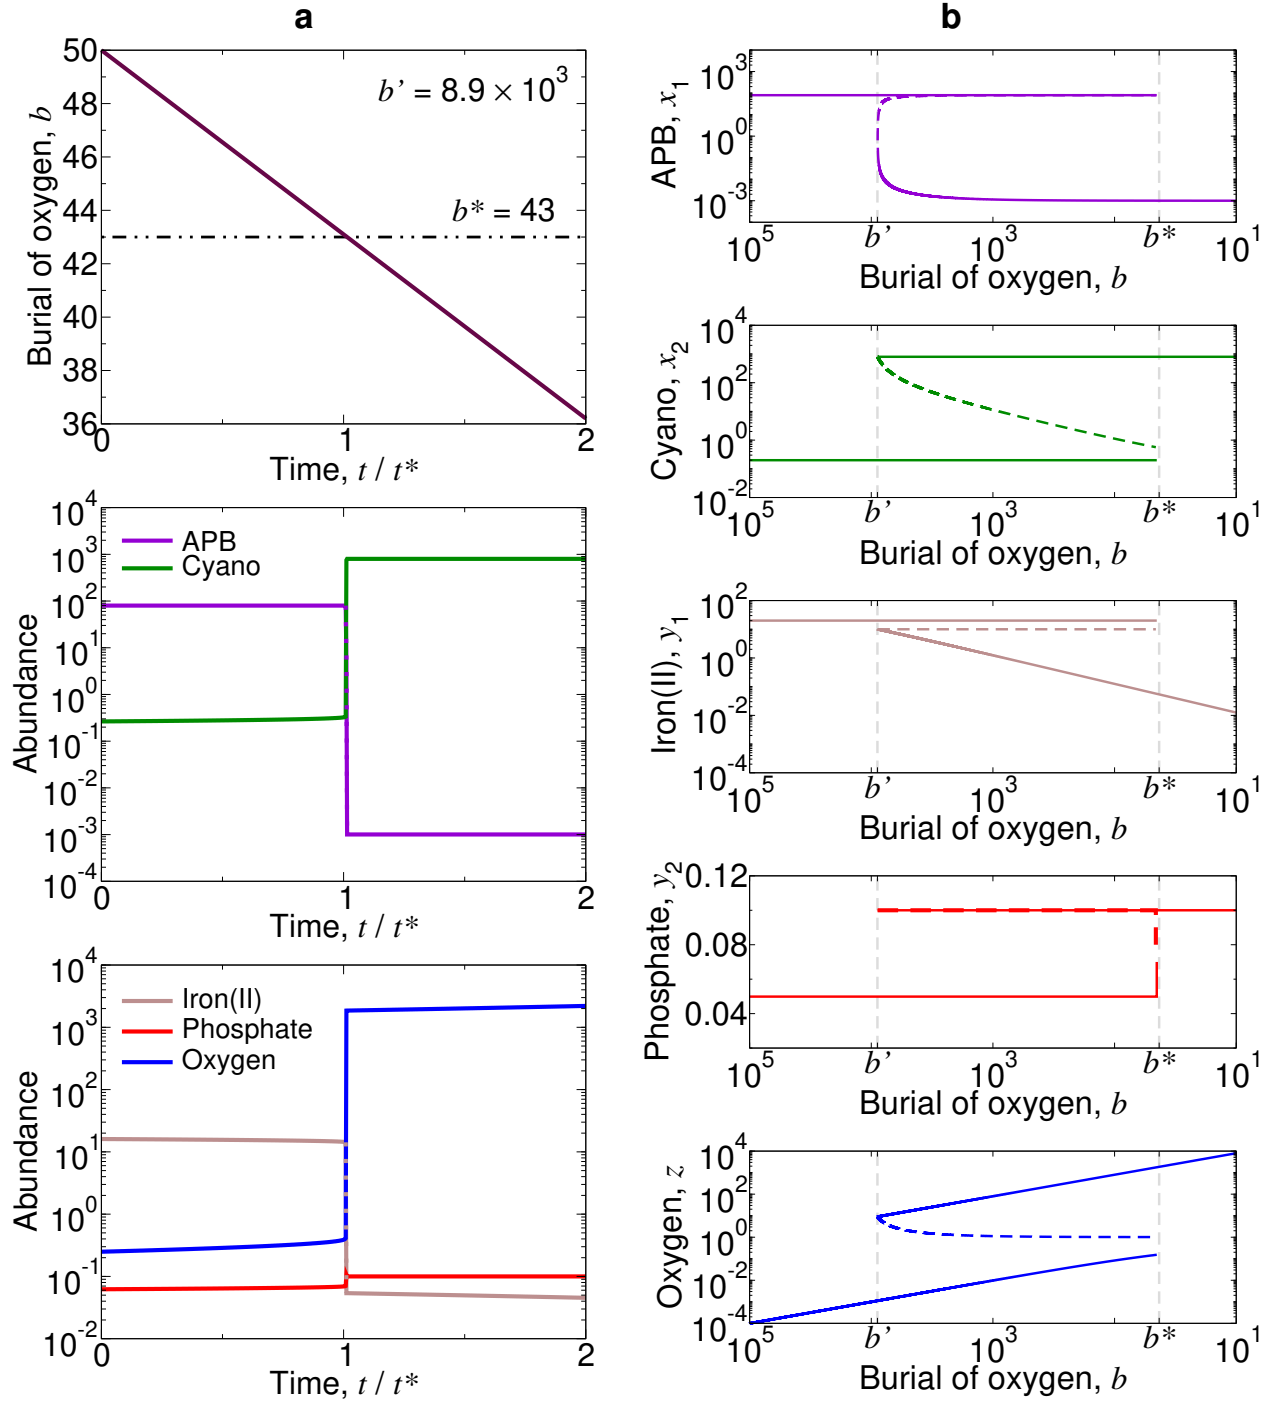

**Fig. S10: The GOE can be triggered by a decline in the burial rate of oxygen.** Equilibrium  $E_2$  (cyanobacteria dominate) gains stability and Equilibrium  $E_1$  (APB dominate) ceases to exist when  $b$  drops below  $b'$  and  $b^*$ , respectively. We set  $f_1 = 100$ ,  $f_2 = 80$ ,  $c = 10$ ,  $a = 10^3$ ,  $u_1 = 10^{-3}$ , and  $u_2 = 0.1$ . **a.** We simulate SI Equations (8) with  $\alpha_1 = \alpha_2 = \beta_1 = \beta_2 = 1$ , and we set  $b = 50 - 20(t/10^5)$ .  $t^*$  denotes the time at which a saddle-node bifurcation occurs. **b.** Bifurcation plots reveal bistability for  $b^* < b < b'$ .

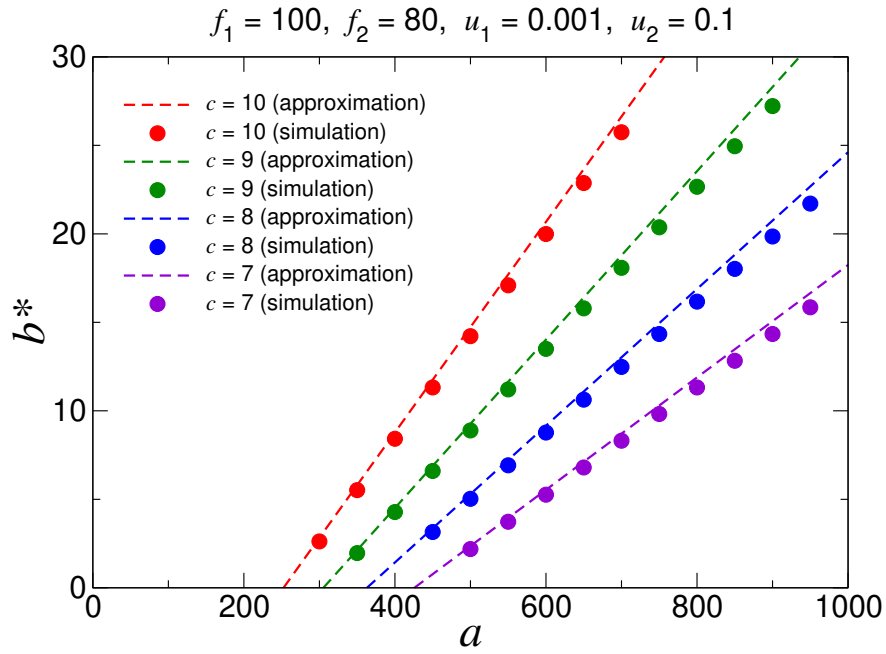

**Fig. S11:** There is a critical value of  $a$ , given by SI Equation (48), below which a declining value of  $b$  cannot trigger a GOE. SI Equation (53) is plotted for  $c = 10, 9, 8$ , and  $7$  (dashed lines). The critical values of  $b$  are measured from numerical integration of SI Equations (8) with  $\alpha_1 = \alpha_2 = \beta_1 = \beta_2 = 1$  (dots).

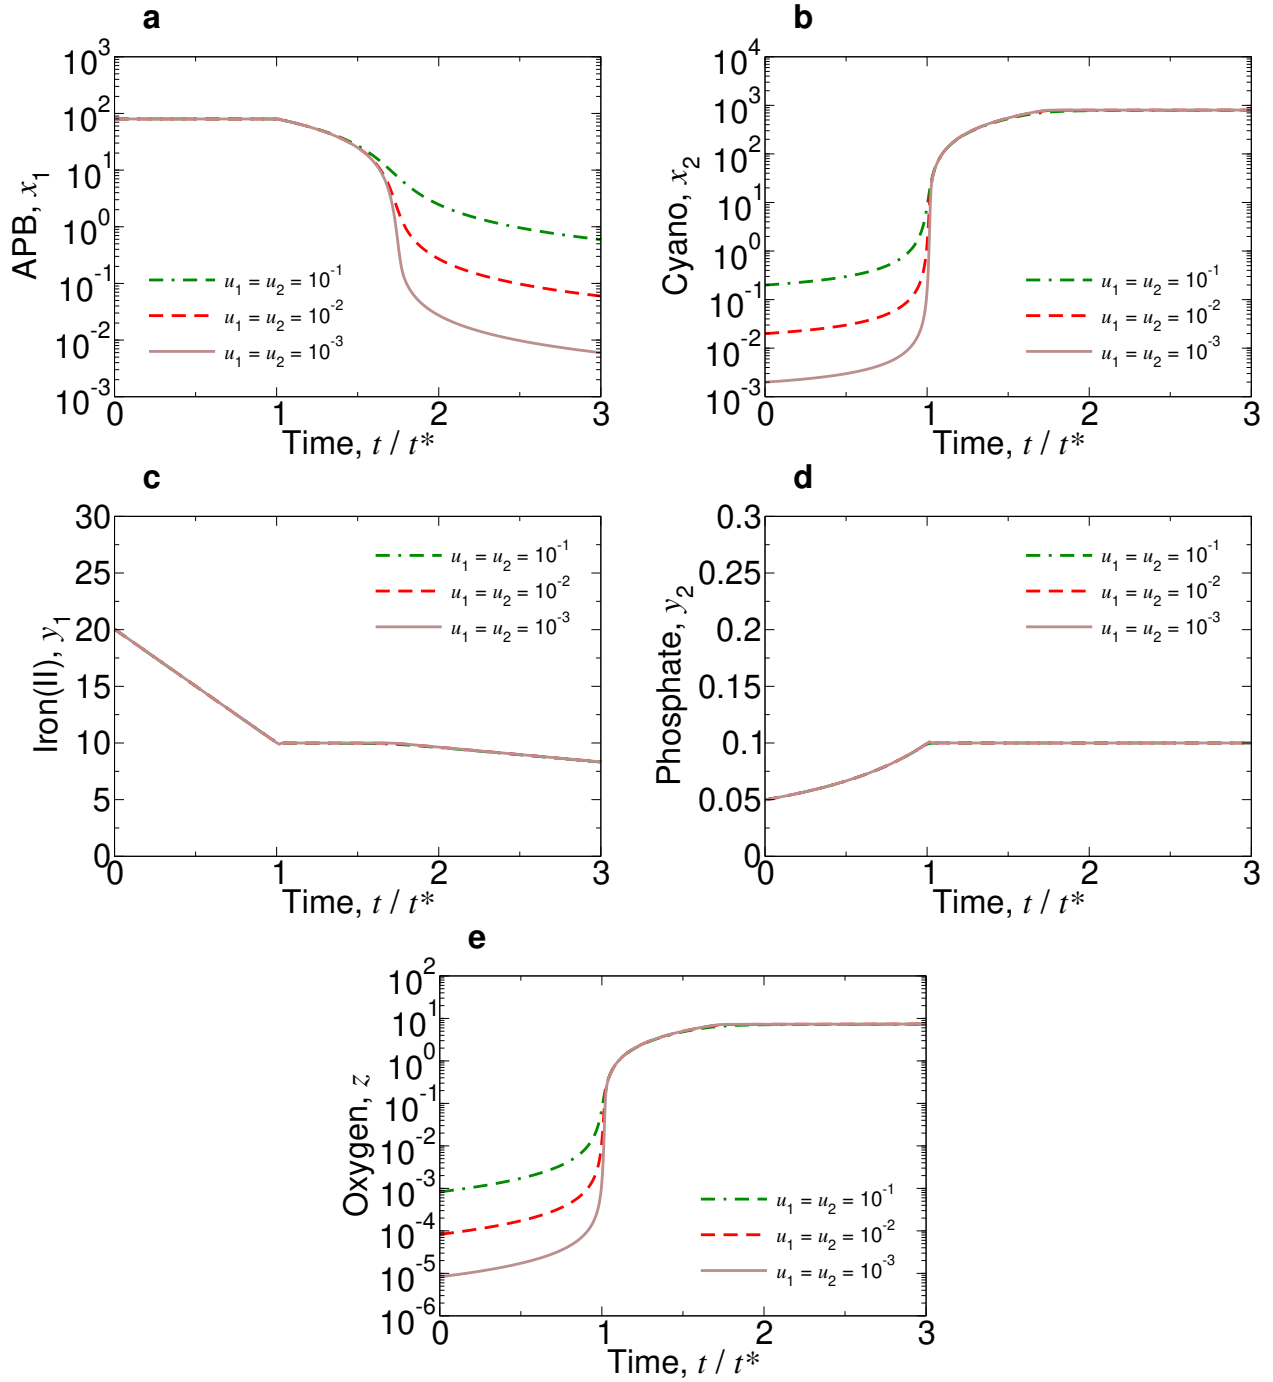

**Fig. S12:** For larger values of the migration rates, the magnitudes of the changes in  $x_1$ ,  $x_2$ , and  $z$  due to the GOE are smaller. A continuous transition is shown. We set  $f_2 = 80$ ,  $c = 10$ ,  $a = 10$ , and  $b = 100$ . We simulate SI Equations (8) with  $\alpha_1 = \alpha_2 = \beta_1 = \beta_2 = 1$ , and we set  $f_1 = 100 - 40(t/10^5)$ . The transition is continuous.  $t^*$  denotes the time at which Equilibrium  $E_1$  loses stability. We plot the abundances of APB (a), cyanobacteria (b), iron(II) (c), phosphate (d), and oxygen (e).

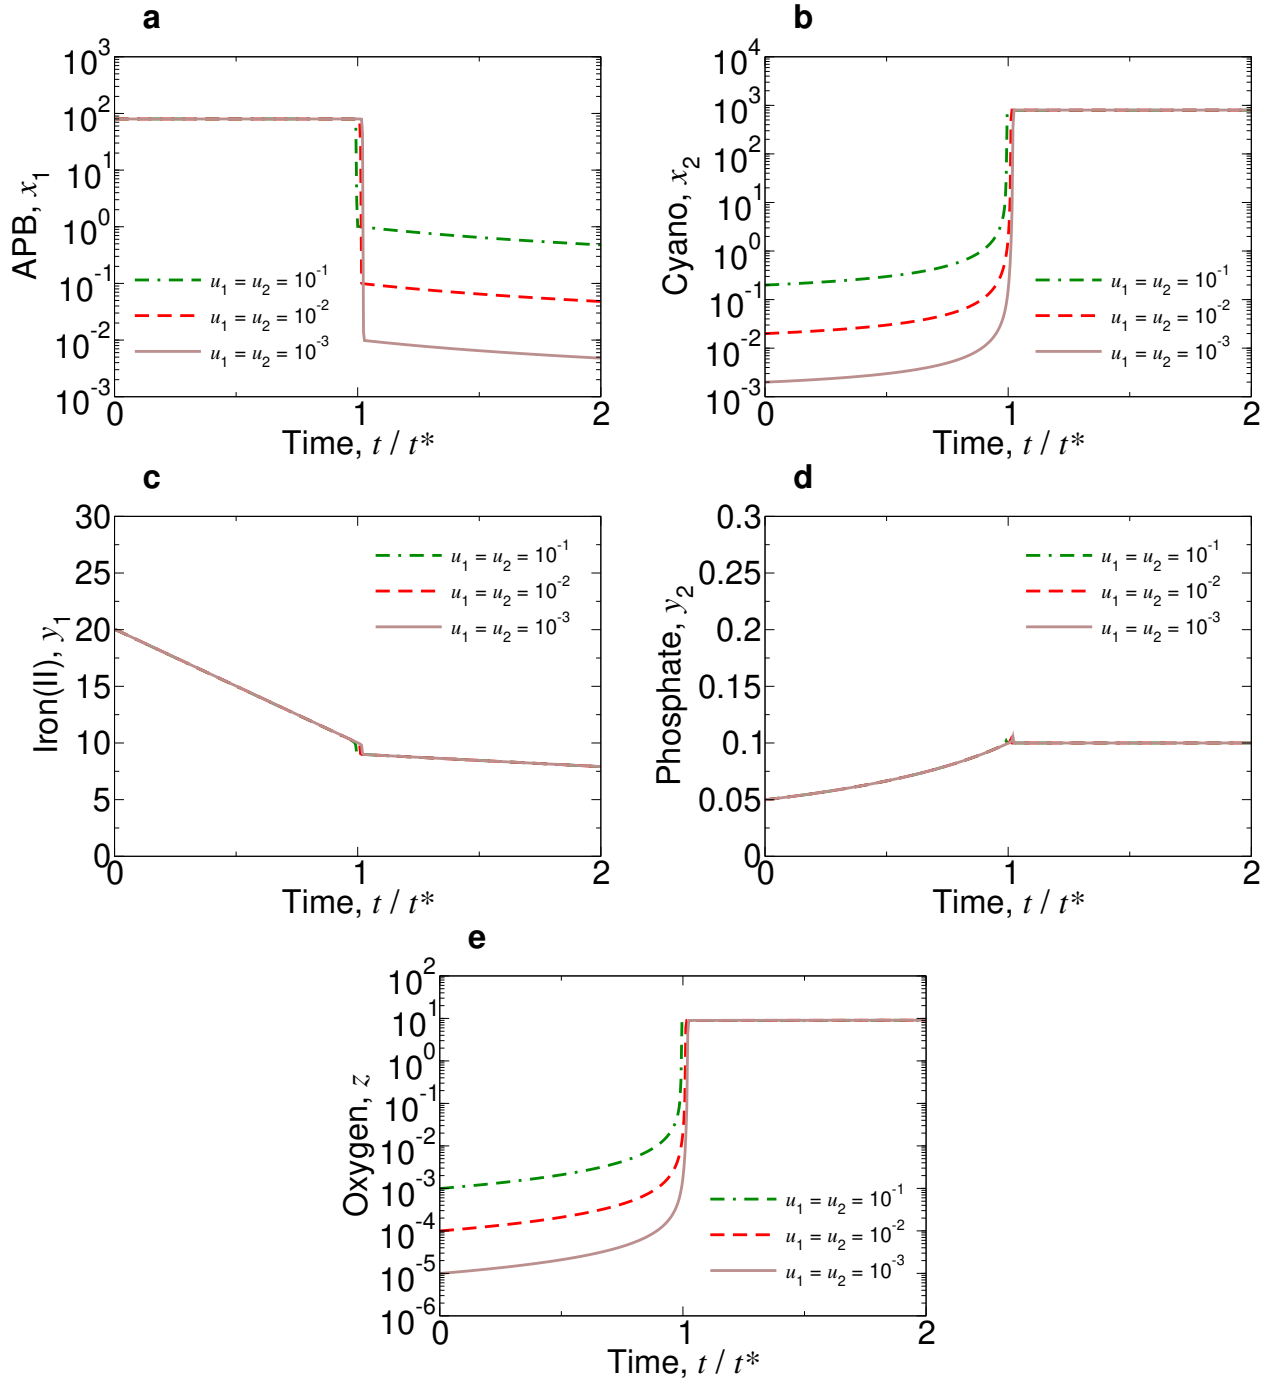

**Fig. S13:** For larger values of the migration rates, the magnitudes of the changes in  $x_1$ ,  $x_2$ , and  $z$  due to the GOE are smaller. A discontinuous transition is shown. We set  $f_2 = 80$ ,  $c = 10$ ,  $a = 10$ , and  $b = 80$ . We simulate SI Equations (8) with  $\alpha_1 = \alpha_2 = \beta_1 = \beta_2 = 1$ , and we set  $f_1 = 100 - 40(t/10^5)$ . The transition is discontinuous.  $t^*$  denotes the time at which Equilibrium  $E_1$  loses stability. We plot the abundances of APB (a), cyanobacteria (b), iron(II) (c), phosphate (d), and oxygen (e).

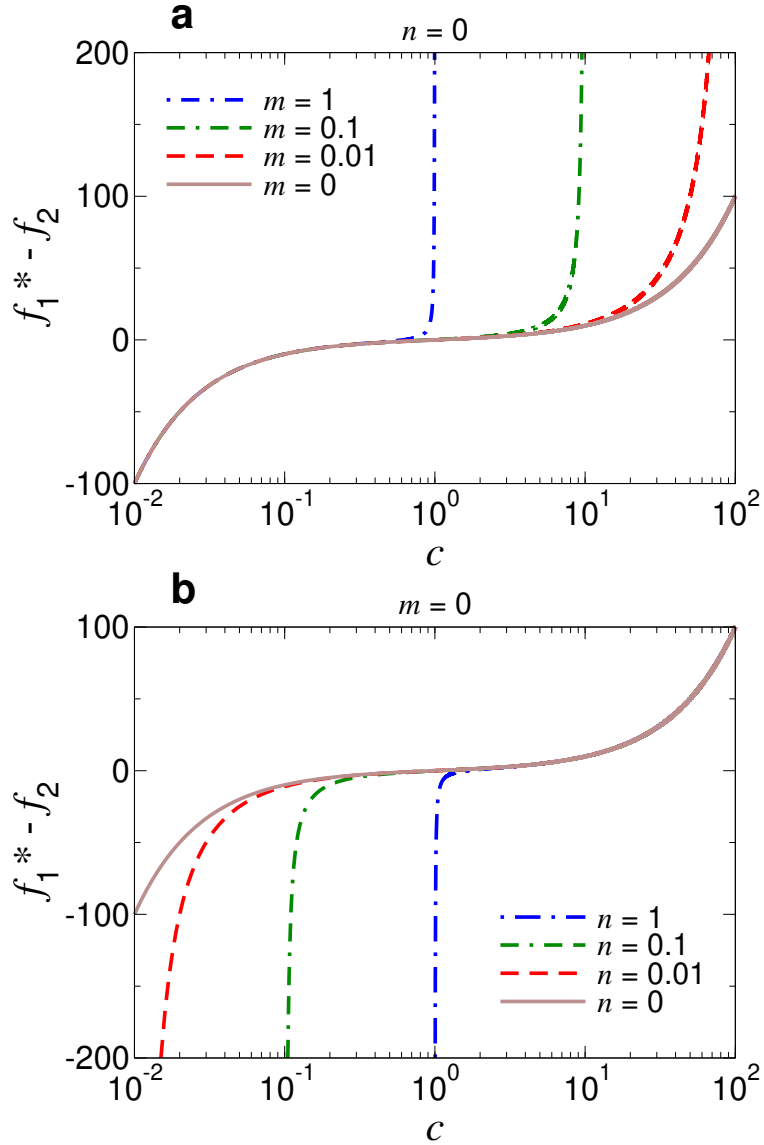

**Fig. S14: The condition for triggering a GOE depends on the parameters  $m$  and  $n$ .** In SI Equation (80), we set  $f_1 = f_1^*$ , and we set  $p' = 0$ . **a.**  $f_1^* - f_2$  is plotted versus  $c$  for  $n = 0$  and different values of  $m$ . **b.**  $f_1^* - f_2$  is plotted versus  $c$  for  $m = 0$  and different values of  $n$ .

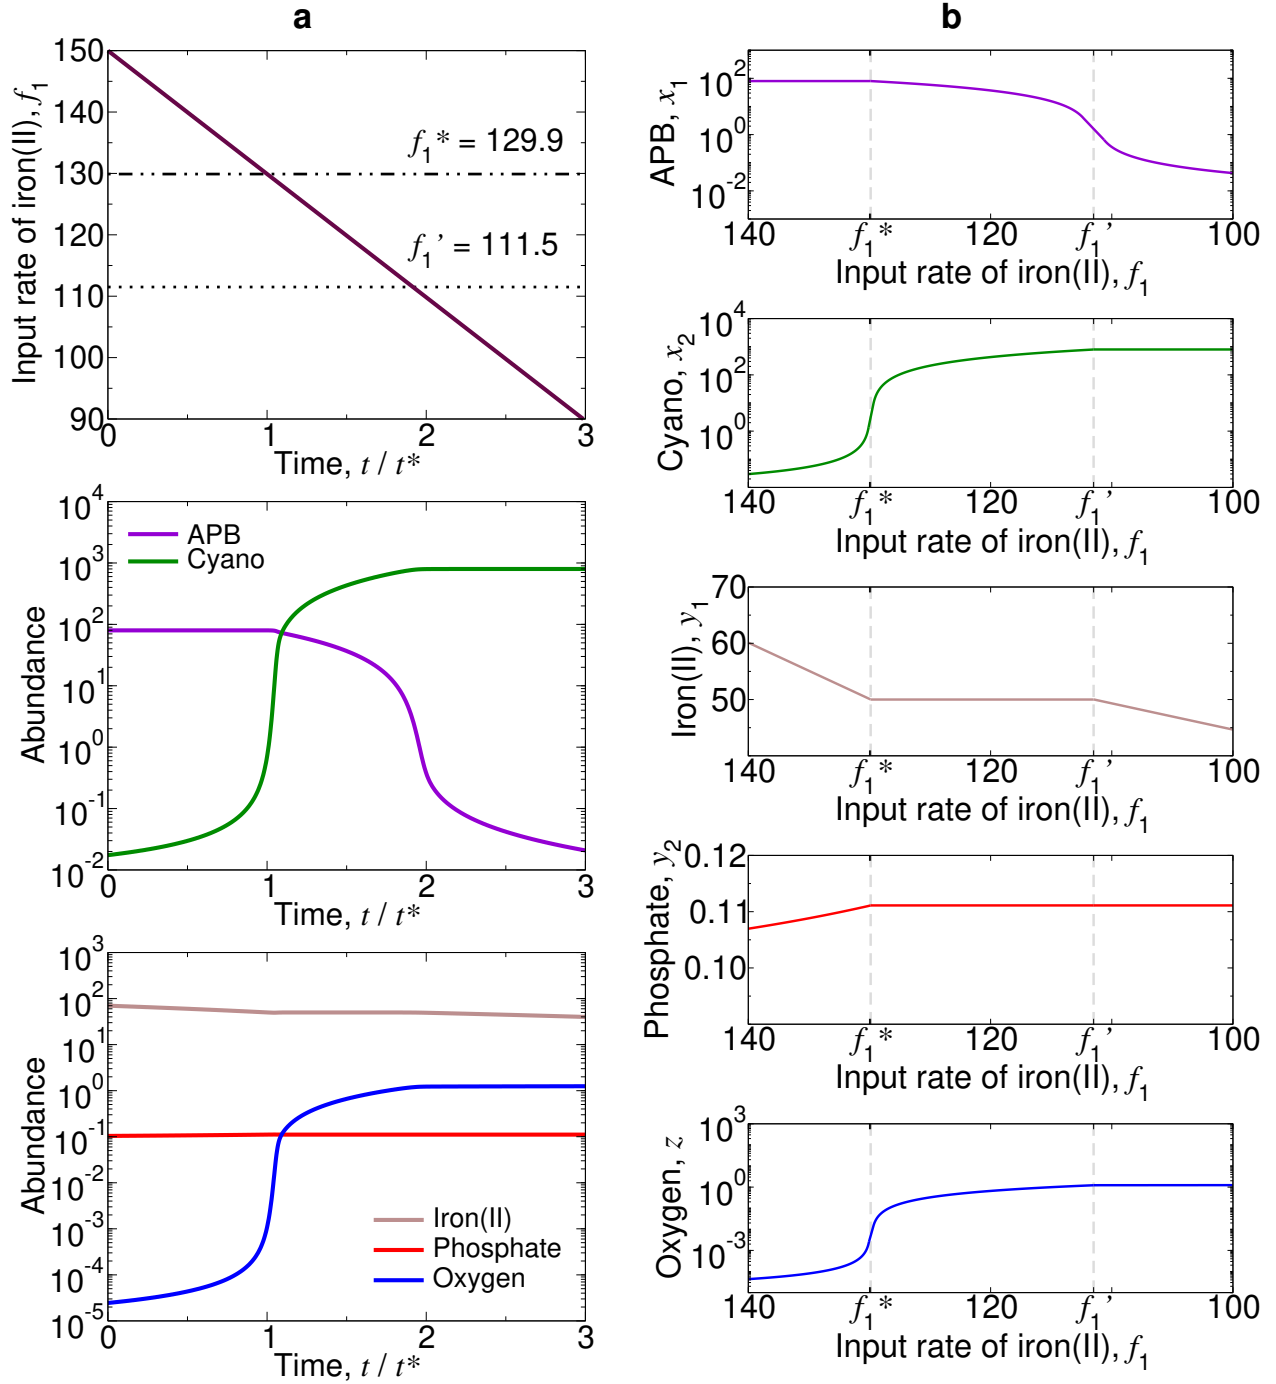

**Fig. S15: The GOE is gradual if  $b > c(a - 1)/(1 - mc)$ .** Equilibrium  $E_1$  (APB dominate) loses stability and Equilibrium  $E_2$  (cyanobacteria dominate) gains stability when  $f_1$  drops below  $f_1^*$  and  $f_1'$ , respectively. We set  $m = 0.08$ ,  $n = 1$ ,  $f_2 = 80$ ,  $c = 10$ ,  $a = 10$ ,  $b = 600$ , and  $u_1 = u_2 = 10^{-3}$ . **a.** We simulate **SI** Equations (77) with  $\alpha_1 = \alpha_2 = \beta_1 = \beta_2 = 1$ , and we set  $f_1 = 150 - 70(t/10^5)$ .  $t^*$  denotes the time at which Equilibrium  $E_1$  loses stability. **b.** There is stable coexistence of both types of bacteria for  $f_1' < f_1 < f_1^*$ .



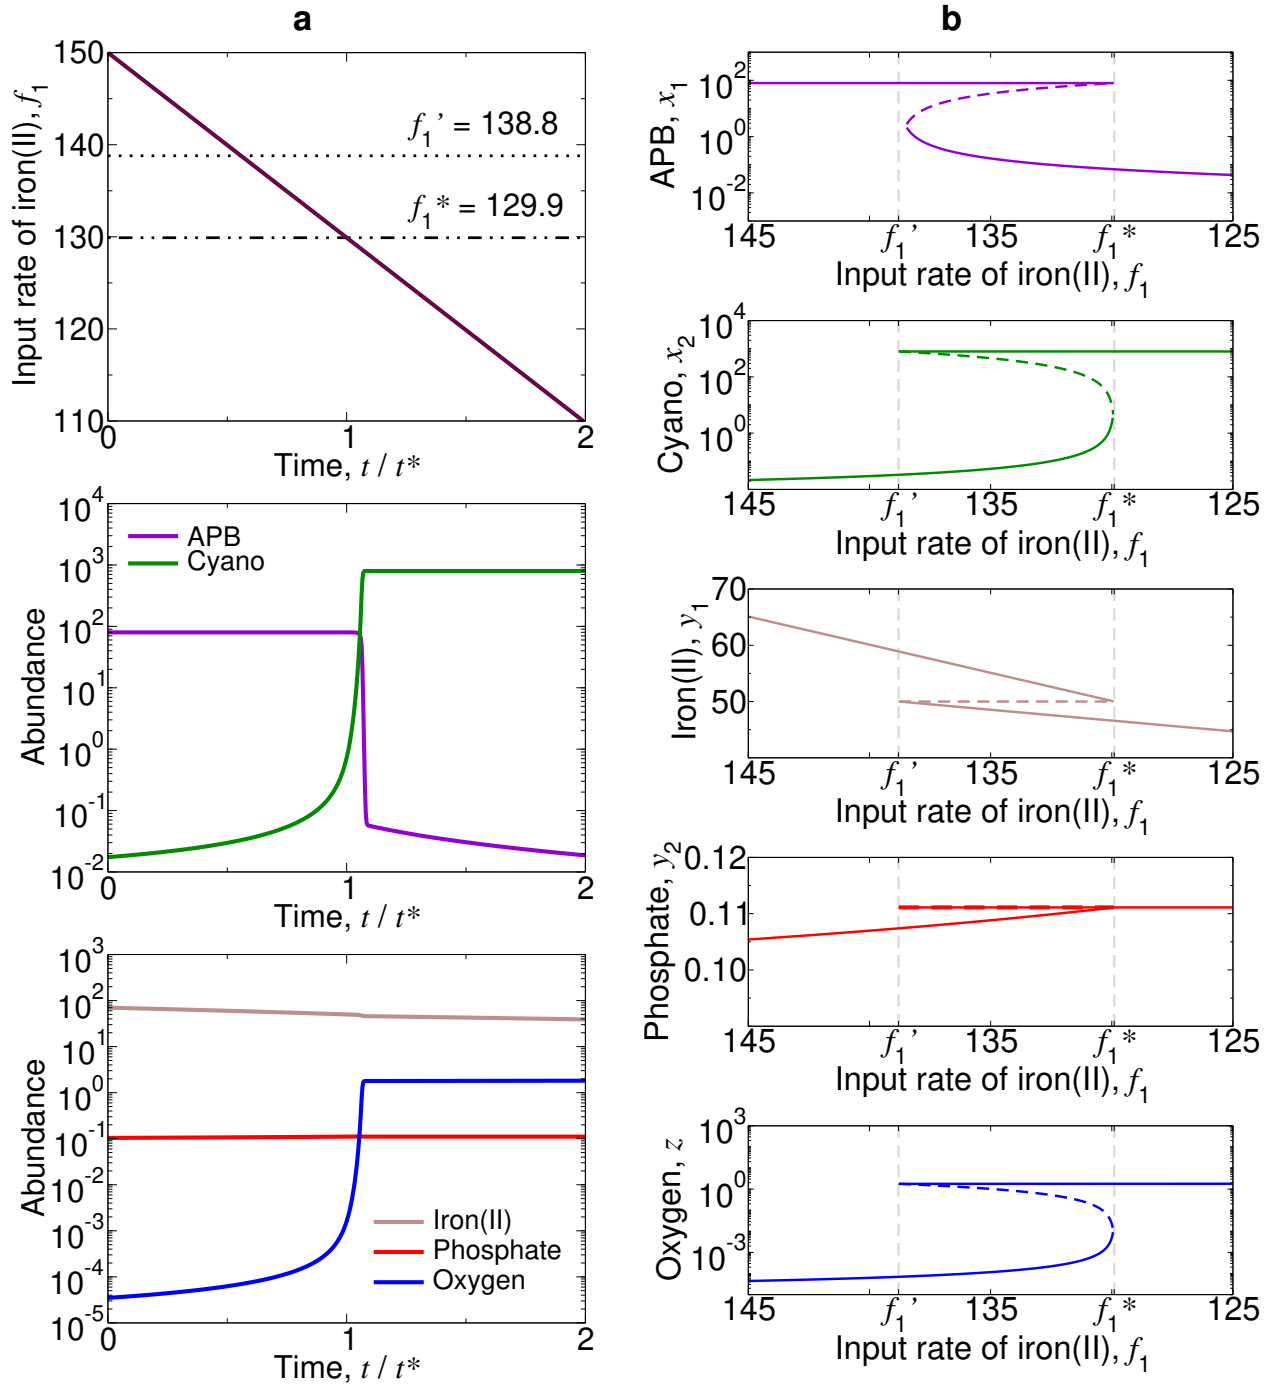

**Fig. S16: The GOE is sudden if  $b < c(a - 1)/(1 - mc)$ .** Equilibrium  $E_2$  (cyanobacteria dominate) gains stability and Equilibrium  $E_1$  (APB dominate) loses stability when  $f_1$  drops below  $f_1'$  and  $f_1^*$ , respectively. We set  $m = 0.08$ ,  $n = 1$ ,  $f_2 = 80$ ,  $c = 10$ ,  $a = 10$ ,  $b = 400$ , and  $u_1 = u_2 = 10^{-3}$ . **a.** We simulate **SI** Equations (77) with  $\alpha_1 = \alpha_2 = \beta_1 = \beta_2 = 1$ , and we set  $f_1 = 150 - 70(t/10^5)$ .  $t^*$  denotes the time at which Equilibrium  $E_1$  loses stability. **b.** Bifurcation plots reveal bistability for  $f_1^* < f_1 < f_1'$ .

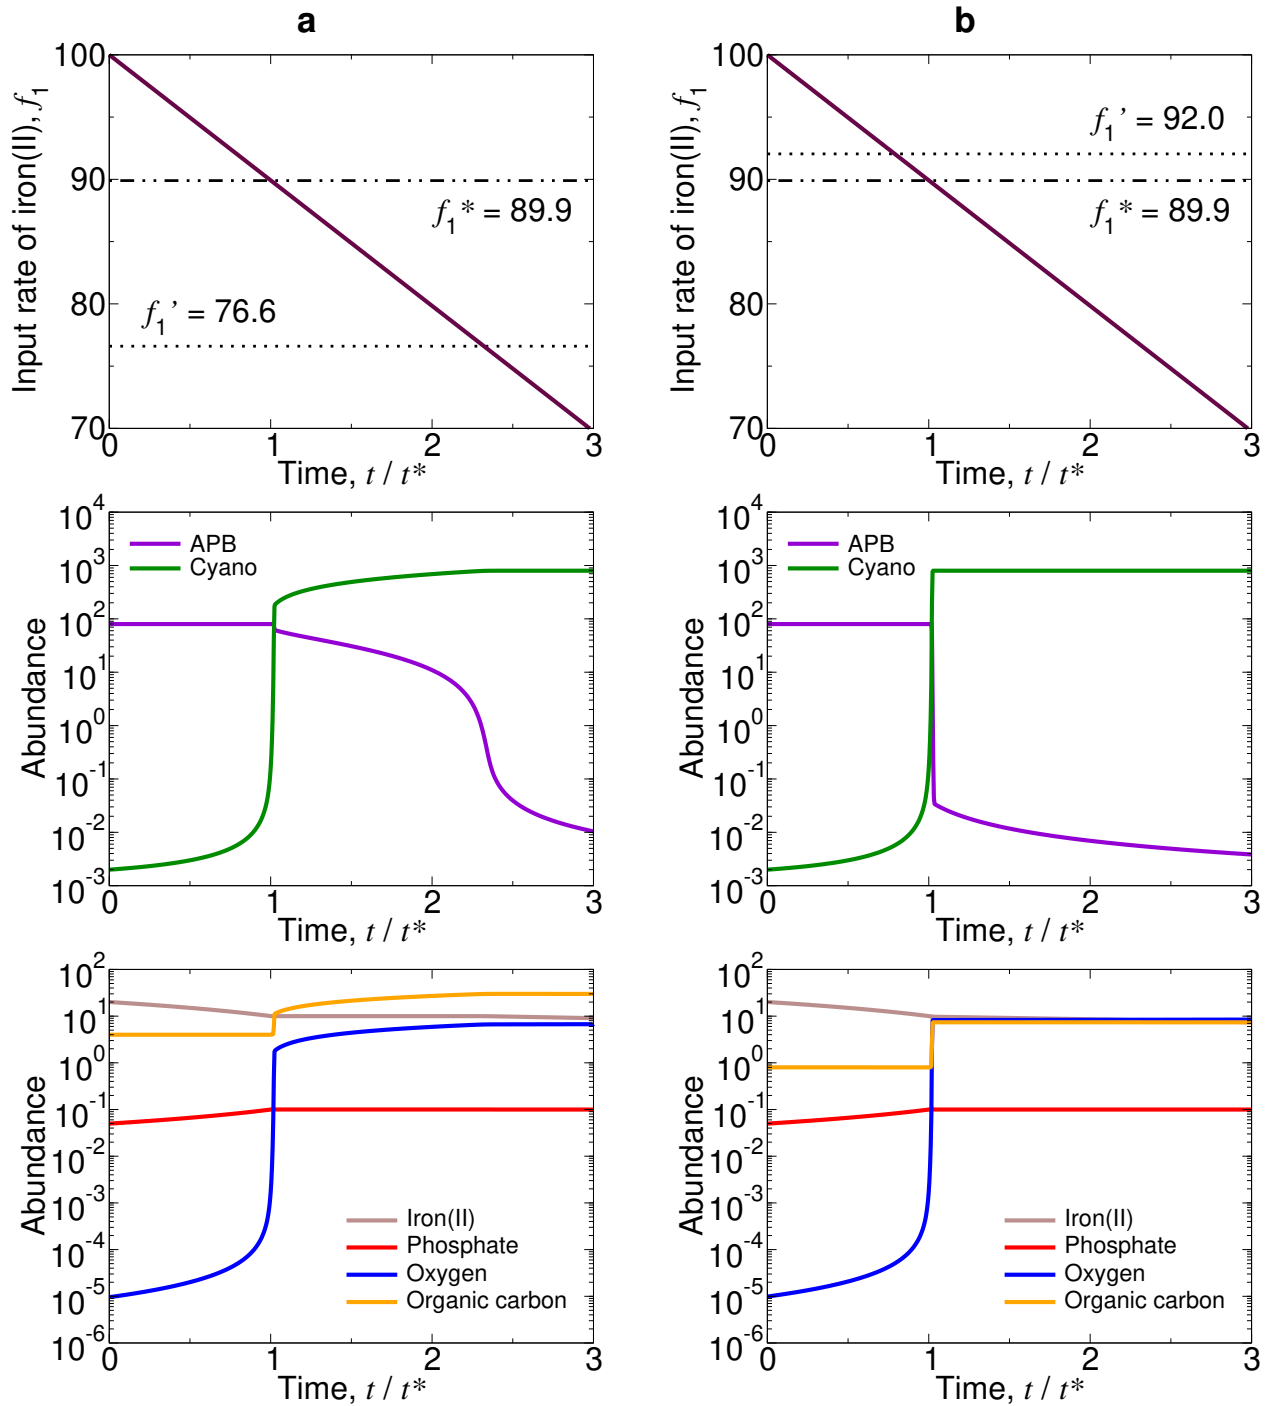

**Fig. S17: The rate of burial of organic carbon does not determine when the GOE is triggered, but it can affect the duration of the GOE.** We set  $f_2 = 80$ ,  $c = 10$ ,  $a = 10$ ,  $b = 80$ ,  $j_1 = j_2 = 1$ , and  $u_1 = u_2 = 10^{-3}$ . We simulate SI Equations (88) with  $\alpha_1 = \alpha_2 = \beta_1 = \beta_2 = \Omega = 1$ , and we set  $f_1 = 100 - 40(t/10^5)$ . **a.** We set  $s = 20$ . The GOE is gradual. **b.** We set  $s = 100$ . The GOE is sudden.

# 1 Supplementary Note 1: Ecological dynamics of anoxygenic photosynthetic bacteria and cyanobacteria

For understanding the mechanisms behind the GOE, we investigate the following system of ordinary differential equations:

$$\begin{aligned}
 \frac{dX_1}{dT} &= C_1X_1Y_1Y_2 - D_1X_1 + U_1 \\
 \frac{dX_2}{dT} &= C_2X_2Y_2 - D_2X_2 + U_2 \\
 \frac{dY_1}{dT} &= F_1 - G_1Y_1 - HX_1Y_1Y_2 - R_1Y_1Z \\
 \frac{dY_2}{dT} &= F_2 - G_2Y_2 - H_1X_1Y_1Y_2 - H_2X_2Y_2 \\
 \frac{dZ}{dT} &= AX_2Y_2 - BZ - RY_1Z
 \end{aligned} \tag{1}$$

$X_1$  is the abundance of anoxygenic photosynthetic bacteria (APB),  $X_2$  is the abundance of cyanobacteria,  $Y_1$  is the abundance of iron(II) ( $\text{Fe}^{2+}$ ),  $Y_2$  is the abundance of phosphate ( $\text{PO}_4^{3-}$ ), and  $Z$  is the abundance of dioxygen ( $\text{O}_2$ ).

All parameters of the model are necessarily positive. APB proliferate at rate  $C_1X_1Y_1Y_2$ , while cyanobacteria proliferate at rate  $C_2X_2Y_2$ . APB die at per-capita rate  $D_1$ , while cyanobacteria die at per-capita rate  $D_2$ . APB migrate into the system at rate  $U_1$ , while cyanobacteria migrate into the system at rate  $U_2$ . Setting  $U_1 > 0$  and  $U_2 > 0$  guarantees that there is always competition between the two types of bacteria.

Iron(II) is input at rate  $F_1$  and lost inorganically at rate  $G_1Y_1$ . APB use iron(II) for reproduction, so iron(II) is lost organically at rate  $HX_1Y_1Y_2$ . Dioxygen rusts iron, reducing the amount of iron at rate  $R_1Y_1Z$ . Phosphate is input at rate  $F_2$  and lost inorganically at rate  $G_2Y_2$ . APB and cyanobacteria both use phosphate for reproduction, so phosphate is also lost organically at rates  $H_1X_1Y_1Y_2$  and  $H_2X_2Y_2$ . Dioxygen is produced by cyanobacteria and enters the system at rate  $AX_2Y_2$ . Dioxygen is buried at rate  $BZ$  and lost due to rusting at rate  $RY_1Z$ .

## 1.1 Rescaling

For understanding the ecological dynamics and fixed points of Equations (1), we can reduce the size of the parameter space without loss of generality. Equations (1) can be rewritten as

$$\begin{aligned}
 \frac{d}{dT}(HX_1) &= (HX_1)(C_1Y_1)Y_2 - D_1(HX_1) + HU_1 \\
 \frac{d}{dT}(H_2X_2) &= C_2(H_2X_2)Y_2 - D_2(H_2X_2) + H_2U_2 \\
 \frac{d}{dT}(C_1Y_1) &= C_1F_1 - G_1(C_1Y_1) - (HX_1)(C_1Y_1)Y_2 - (C_1Y_1)(R_1Z) \\
 \frac{dY_2}{dT} &= F_2 - G_2Y_2 - \left(\frac{H_1}{C_1H}\right) (HX_1)(C_1Y_1)Y_2 - (H_2X_2)Y_2 \\
 \frac{d}{dT}(R_1Z) &= \left(\frac{AR_1}{H_2}\right) (H_2X_2)Y_2 - B(R_1Z) - \left(\frac{R}{C_1}\right) (C_1Y_1)(R_1Z)
 \end{aligned} \tag{2}$$

We can further rewrite Equations (2) as

$$\begin{aligned}
\left(\frac{1}{D_1}\right) \frac{d}{dT} \left(\frac{HX_1}{G_1}\right) &= \left(\frac{HX_1}{G_1}\right) \left(\frac{C_1Y_1}{D_1}\right) Y_2 - \frac{HX_1}{G_1} + \frac{HU_1}{D_1G_1} \\
\left(\frac{1}{D_2}\right) \frac{d}{dT} \left(\frac{H_2X_2}{G_2}\right) &= \left(\frac{C_2}{D_2}\right) \left(\frac{H_2X_2}{G_2}\right) Y_2 - \frac{H_2X_2}{G_2} + \frac{H_2U_2}{D_2G_2} \\
\left(\frac{1}{G_1}\right) \frac{d}{dT} \left(\frac{C_1Y_1}{D_1}\right) &= \frac{C_1F_1}{D_1G_1} - \frac{C_1Y_1}{D_1} \\
&\quad - \left(\frac{HX_1}{G_1}\right) \left(\frac{C_1Y_1}{D_1}\right) Y_2 - \left(\frac{C_1Y_1}{D_1}\right) \left(\frac{R_1Z}{G_1}\right) \\
\left(\frac{1}{G_2}\right) \frac{dY_2}{dT} &= \frac{F_2}{G_2} - Y_2 \\
&\quad - \left(\frac{D_1G_1H_1}{C_1G_2H}\right) \left(\frac{HX_1}{G_1}\right) \left(\frac{C_1Y_1}{D_1}\right) Y_2 - \left(\frac{H_2X_2}{G_2}\right) Y_2 \\
\left(\frac{C_1}{D_1R}\right) \frac{d}{dT} \left(\frac{R_1Z}{G_1}\right) &= \left(\frac{AC_1G_2R_1}{D_1G_1H_2R}\right) \left(\frac{H_2X_2}{G_2}\right) Y_2 \\
&\quad - \left(\frac{BC_1}{D_1R}\right) \left(\frac{R_1Z}{G_1}\right) - \left(\frac{C_1Y_1}{D_1}\right) \left(\frac{R_1Z}{G_1}\right)
\end{aligned} \tag{3}$$

We define

$$k \equiv \sqrt{\frac{D_1G_1H_1}{C_1G_2H}} \tag{4}$$

Using Equation (4), Equations (3) can be rewritten as

$$\begin{aligned}
\left(\frac{1}{D_1}\right) \frac{d}{dT} \left(\frac{kHX_1}{G_1}\right) &= \left(\frac{kHX_1}{G_1}\right) \left(\frac{kC_1Y_1}{D_1}\right) \left(\frac{Y_2}{k}\right) - \frac{kHX_1}{G_1} + \frac{kHU_1}{D_1G_1} \\
\left(\frac{1}{D_2}\right) \frac{d}{dT} \left(\frac{H_2X_2}{G_2}\right) &= \left(\frac{kC_2}{D_2}\right) \left(\frac{H_2X_2}{G_2}\right) \left(\frac{Y_2}{k}\right) - \frac{H_2X_2}{G_2} + \frac{H_2U_2}{D_2G_2} \\
\left(\frac{1}{G_1}\right) \frac{d}{dT} \left(\frac{kC_1Y_1}{D_1}\right) &= \frac{kC_1F_1}{D_1G_1} - \frac{kC_1Y_1}{D_1} \\
&\quad - \left(\frac{kHX_1}{G_1}\right) \left(\frac{kC_1Y_1}{D_1}\right) \left(\frac{Y_2}{k}\right) - \left(\frac{kC_1Y_1}{D_1}\right) \left(\frac{R_1Z}{G_1}\right) \\
\left(\frac{1}{G_2}\right) \frac{d}{dT} \left(\frac{Y_2}{k}\right) &= \frac{F_2}{kG_2} - \frac{Y_2}{k} \\
&\quad - \left(\frac{kHX_1}{G_1}\right) \left(\frac{kC_1Y_1}{D_1}\right) \left(\frac{Y_2}{k}\right) - \left(\frac{H_2X_2}{G_2}\right) \left(\frac{Y_2}{k}\right) \\
\left(\frac{kC_1}{D_1R}\right) \frac{d}{dT} \left(\frac{R_1Z}{G_1}\right) &= \left(\frac{k^2AC_1G_2R_1}{D_1G_1H_2R}\right) \left(\frac{H_2X_2}{G_2}\right) \left(\frac{Y_2}{k}\right) \\
&\quad - \left(\frac{kBC_1}{D_1R}\right) \left(\frac{R_1Z}{G_1}\right) - \left(\frac{kC_1Y_1}{D_1}\right) \left(\frac{R_1Z}{G_1}\right)
\end{aligned} \tag{5}$$

To simplify Equations (5), we make the following definitions:

$$\begin{aligned}
a &\equiv \frac{k^2 AC_1 G_2 R_1}{D_1 G_1 H_2 R} \\
b &\equiv \frac{k B C_1}{D_1 R} \\
c &\equiv \frac{k C_2}{D_2} \\
f_1 &\equiv \frac{k C_1 F_1}{D_1 G_1} \\
f_2 &\equiv \frac{F_2}{k G_2} \\
u_1 &\equiv \frac{k H U_1}{D_1 G_1} \\
u_2 &\equiv \frac{H_2 U_2}{D_2 G_2} \\
x_1 &\equiv \frac{k H X_1}{G_1} \\
x_2 &\equiv \frac{H_2 X_2}{G_2} \\
y_1 &\equiv \frac{k C_1 Y_1}{D_1} \\
y_2 &\equiv \frac{Y_2}{k} \\
z &\equiv \frac{R_1 Z}{G_1}
\end{aligned} \tag{6}$$

We also define

$$\begin{aligned}
\gamma &\equiv \frac{k C_1}{D_1 R} \\
t &\equiv \frac{T}{\gamma} \\
\alpha_1 &\equiv \frac{1}{\gamma D_1} \\
\alpha_2 &\equiv \frac{1}{\gamma D_2} \\
\beta_1 &\equiv \frac{1}{\gamma G_1} \\
\beta_2 &\equiv \frac{1}{\gamma G_2}
\end{aligned} \tag{7}$$

Substituting Equations (6) and (7) into Equations (5), we obtain

$$\begin{aligned}
\alpha_1 \dot{x}_1 &= x_1 y_1 y_2 - x_1 + u_1 \\
\alpha_2 \dot{x}_2 &= c x_2 y_2 - x_2 + u_2 \\
\beta_1 \dot{y}_1 &= f_1 - y_1 - x_1 y_1 y_2 - y_1 z \\
\beta_2 \dot{y}_2 &= f_2 - y_2 - x_1 y_1 y_2 - x_2 y_2 \\
\dot{z} &= a x_2 y_2 - b z - y_1 z
\end{aligned} \tag{8}$$

An overdot denotes the derivative with respect to  $t$ . For studying the ecological dynamics, without loss of generality, we consider Equations (8).

### 1.1.1 Two-dimensional approximation of the dynamics

From Equations (8), for approximating the dynamics, we can also consider a simplified system of equations:

$$\begin{aligned}
\alpha_1 \dot{x}_1 &\approx x_1 y_1 y_2 - x_1 + u_1 \\
\alpha_2 \dot{x}_2 &\approx c x_2 y_2 - x_2 + u_2 \\
0 &\approx f_1 - y_1 - x_1 y_1 y_2 - y_1 z \\
0 &\approx f_2 - y_2 - x_1 y_1 y_2 - x_2 y_2 \\
0 &\approx a x_2 - b z
\end{aligned} \tag{9}$$

We define

$$\xi \equiv \frac{b}{a} \tag{10}$$

Using Equation (10), from the fifth of Equations (9), we have

$$z \approx \frac{x_2}{\xi} \tag{11}$$

Using Equation (11), from the third and fourth of Equations (9), we have

$$\begin{aligned}
y_1 &\approx \frac{1}{2x_1(\xi + x_2)} \left[ - (1 + x_2)(\xi + x_2) + \xi x_1 (f_1 - f_2) \right. \\
&\quad \left. + \sqrt{[(1 + x_2)(\xi + x_2) - \xi x_1 (f_1 - f_2)]^2 + 4\xi f_1 x_1 (1 + x_2)(\xi + x_2)} \right]
\end{aligned} \tag{12}$$

We also have

$$\begin{aligned}
y_2 &\approx \frac{1}{2\xi x_1 (1 + x_2)} \left[ - (1 + x_2)(\xi + x_2) - \xi x_1 (f_1 - f_2) \right. \\
&\quad \left. + \sqrt{[(1 + x_2)(\xi + x_2) - \xi x_1 (f_1 - f_2)]^2 + 4\xi f_1 x_1 (1 + x_2)(\xi + x_2)} \right]
\end{aligned} \tag{13}$$

Substituting Equations (12) and (13) into the first and second of Equations (9), we obtain

$$\begin{aligned}
\alpha_1 \dot{x}_1 &\approx \frac{x_1}{4\xi x_1^2(1+x_2)(\xi+x_2)} \left[ - (1+x_2)(\xi+x_2) + \xi x_1(f_1-f_2) \right. \\
&\quad \left. + \sqrt{[(1+x_2)(\xi+x_2) - \xi x_1(f_1-f_2)]^2 + 4\xi f_1 x_1(1+x_2)(\xi+x_2)} \right] \\
&\quad \times \left[ - (1+x_2)(\xi+x_2) - \xi x_1(f_1-f_2) \right. \\
&\quad \left. + \sqrt{[(1+x_2)(\xi+x_2) - \xi x_1(f_1-f_2)]^2 + 4\xi f_1 x_1(1+x_2)(\xi+x_2)} \right] - x_1 + u_1 \\
\alpha_2 \dot{x}_2 &\approx \frac{cx_2}{2\xi x_1(1+x_2)} \left[ - (1+x_2)(\xi+x_2) - \xi x_1(f_1-f_2) \right. \\
&\quad \left. + \sqrt{[(1+x_2)(\xi+x_2) - \xi x_1(f_1-f_2)]^2 + 4\xi f_1 x_1(1+x_2)(\xi+x_2)} \right] - x_2 + u_2
\end{aligned} \tag{14}$$

For constructing phase portraits that approximately represent the dynamics of  $x_1$  and  $x_2$ , we use Equations (14).

## 1.2 Fixed points

The fixed points of the ecological dynamics are obtained from the steady state of Equations (8):

$$\begin{aligned}
0 &= \bar{x}_1 \bar{y}_1 \bar{y}_2 - \bar{x}_1 + u_1 \\
0 &= c \bar{x}_2 \bar{y}_2 - \bar{x}_2 + u_2 \\
0 &= f_1 - \bar{y}_1 - \bar{x}_1 \bar{y}_1 \bar{y}_2 - \bar{y}_1 \bar{z} \\
0 &= f_2 - \bar{y}_2 - \bar{x}_1 \bar{y}_1 \bar{y}_2 - \bar{x}_2 \bar{y}_2 \\
0 &= a \bar{x}_2 \bar{y}_2 - b \bar{z} - \bar{y}_1 \bar{z}
\end{aligned} \tag{15}$$

We solve for the fixed points of Equations (8) without loss of generality by considering Equations (15).

## 1.3 Basic considerations

We assume that on the time scale of reproduction and death of the bacteria, the parameters in Equations (8) are approximately constant. This means that at any given time,  $x_1$ ,  $x_2$ ,  $y_1$ ,  $y_2$ , and  $z$  in Equations (8) are approximately in steady state. On a much longer time scale, as the planet slowly changes its physical and chemical makeup, the parameters in Equations (8) change accordingly. This separation of time scales between that of planetary change and that of the ecological dynamics of the bacteria means that, for understanding the GOE, we can focus on the fixed points of Equations (8)—given by Equations (15)—and their dynamical stability (**Fig. S1** and **Fig. S2**). The key consideration then becomes how the fixed points given by Equations (15) and their stability properties depend on the parameters of the model.

The foundation of our understanding of the GOE is based on assuming that the migration rates,  $u_1$  and  $u_2$ , are small. Setting  $u_1 = u_2 = 0$  in Equations (8), there are a few basic considerations:

- **Can the fixed point for which cyanobacteria are extinct be invaded by a small amount of cyanobacteria?** Prior to the GOE, a small amount of cyanobacteria cannot grow to establish a stable population of cyanobacteria. As parameter values change on geological time scales, however, conditions can become favorable for cyanobacteria to outcompete APB.
- **Is there a fixed point for which APB and cyanobacteria stably coexist?** If there is, then oxygenation of Earth's atmosphere can be gradual. If there is not, then oxygenation can be sudden and drastic.
- **Can the fixed point for which APB are extinct be invaded by a small amount of APB?** If it cannot, then after the GOE, the state of the global ecosystem is robust—parameter values might change in the reverse direction, but cyanobacteria remain dominant. This can result in hysteresis in the chemical makeup of Earth's atmosphere.

## 1.4 Mathematical analysis with arbitrarily small migration

$u_1$  and  $u_2$  are always positive, but for understanding the causes of the GOE, it is helpful to assume that they are arbitrarily small. Accordingly, we characterize the case where  $u_1 = u_2 = 0$ . We obtain simple analytical results for the fixed points and their stability properties.

### 1.4.1 Fixed points

We begin by calculating the fixed points of Equations (8) and their stability properties for the case of no migration. Setting  $u_1 = u_2 = 0$  in Equations (15), we have

$$\begin{aligned}
0 &= (\bar{y}_1 \bar{y}_2 - 1) \bar{x}_1 \\
0 &= (c \bar{y}_2 - 1) \bar{x}_2 \\
0 &= f_1 - \bar{y}_1 - \bar{x}_1 \bar{y}_1 \bar{y}_2 - \bar{y}_1 \bar{z} \\
0 &= f_2 - \bar{y}_2 - \bar{x}_1 \bar{y}_1 \bar{y}_2 - \bar{x}_2 \bar{y}_2 \\
0 &= a \bar{x}_2 \bar{y}_2 - b \bar{z} - \bar{y}_1 \bar{z}
\end{aligned} \tag{16}$$

We set  $\bar{x}_2 = 0$  with  $\bar{x}_1 > 0$  in Equations (16) to calculate the fixed point for which cyanobacteria are extinct but APB are abundant. We have

$$\begin{aligned}
0 &= y_1^{(1)} y_2^{(1)} - 1 \\
0 &= x_2^{(1)} \\
0 &= f_1 - y_1^{(1)} - x_1^{(1)} y_1^{(1)} y_2^{(1)} - y_1^{(1)} z^{(1)} \\
0 &= f_2 - y_2^{(1)} - x_1^{(1)} y_1^{(1)} y_2^{(1)} - x_2^{(1)} y_2^{(1)} \\
0 &= a x_2^{(1)} y_2^{(1)} - b z^{(1)} - y_1^{(1)} z^{(1)}
\end{aligned} \tag{17}$$

From Equations (17), we have

$$0 = \left(y_1^{(1)}\right)^2 + (f_2 - f_1) y_1^{(1)} - 1$$



Solving this quadratic equation for  $y_1^{(1)}$ , keeping the physical solution, and substituting this into Equations (17), we obtain

$$\begin{aligned}
x_1^{(1)} &= \frac{f_1 + f_2 - \sqrt{(f_1 - f_2)^2 + 4}}{2} \\
x_2^{(1)} &= 0 \\
y_1^{(1)} &= \frac{f_1 - f_2 + \sqrt{(f_1 - f_2)^2 + 4}}{2} \\
y_2^{(1)} &= \frac{f_2 - f_1 + \sqrt{(f_1 - f_2)^2 + 4}}{2} \\
z^{(1)} &= 0
\end{aligned} \tag{18}$$

Equilibrium  $E_1$  is given by Equations (18).

We set  $\bar{x}_1 = 0$  with  $\bar{x}_2 > 0$  in Equations (16) to calculate the fixed point for which APB are extinct but cyanobacteria are abundant. We have

$$\begin{aligned}
0 &= x_1^{(2)} \\
0 &= cy_2^{(2)} - 1 \\
0 &= f_1 - y_1^{(2)} - x_1^{(2)}y_1^{(2)}y_2^{(2)} - y_1^{(2)}z^{(2)} \\
0 &= f_2 - y_2^{(2)} - x_1^{(2)}y_1^{(2)}y_2^{(2)} - x_2^{(2)}y_2^{(2)} \\
0 &= ax_2^{(2)}y_2^{(2)} - bz^{(2)} - y_1^{(2)}z^{(2)}
\end{aligned} \tag{19}$$

Simplifying Equations (19), we obtain

$$\begin{aligned}
x_1^{(2)} &= 0 \\
x_2^{(2)} &= cf_2 - 1 \\
y_1^{(2)} &= \frac{c(f_1 - b) - a(cf_2 - 1) + \sqrt{[c(f_1 - b) - a(cf_2 - 1)]^2 + 4bc^2f_1}}{2c} \\
y_2^{(2)} &= \frac{1}{c} \\
z^{(2)} &= \frac{a(cf_2 - 1) - c(f_1 + b) + \sqrt{[c(f_1 - b) - a(cf_2 - 1)]^2 + 4bc^2f_1}}{2bc}
\end{aligned} \tag{20}$$

Equilibrium  $E_2$  is given by Equations (20).

The interior equilibrium corresponds to having both  $\bar{x}_1 > 0$  and  $\bar{x}_2 > 0$  in Equations (16). We have

$$\begin{aligned}
0 &= \hat{y}_1\hat{y}_2 - 1 \\
0 &= c\hat{y}_2 - 1 \\
0 &= f_1 - \hat{y}_1 - \hat{x}_1\hat{y}_1\hat{y}_2 - \hat{y}_1\hat{z} \\
0 &= f_2 - \hat{y}_2 - \hat{x}_1\hat{y}_1\hat{y}_2 - \hat{x}_2\hat{y}_2 \\
0 &= a\hat{x}_2\hat{y}_2 - b\hat{z} - \hat{y}_1\hat{z}
\end{aligned} \tag{21}$$

The equations for the interior equilibrium are written most simply by using the following defini-

tions:

$$p = c[c - (f_1 - f_2)] - 1 \quad (22)$$

$$q = (b + c)(f_1 - c) - a(cf_2 - 1) \quad (23)$$

$$r = b - c(a - 1) \quad (24)$$

Simplifying Equations (21), we obtain

$$\begin{aligned} \hat{x}_1 &= \frac{q}{r} \\ \hat{x}_2 &= (b + c) \left( \frac{p}{r} \right) \\ \hat{y}_1 &= c \\ \hat{y}_2 &= \frac{1}{c} \\ \hat{z} &= \left( \frac{a}{c} \right) \left( \frac{p}{r} \right) \end{aligned} \quad (25)$$

Equilibrium  $\hat{E}$  is given by Equations (25), (22), (23), and (24).

### 1.4.2 Dynamical stability

For determining the dynamical stability of Equilibrium  $E_1$ , we use the following:

$$\begin{aligned} x_1(t) &= x_1^{(1)} + \epsilon(\delta x_1) \exp(\lambda_1 t) \\ x_2(t) &= x_2^{(1)} + \epsilon(\delta x_2) \exp(\lambda_1 t) \\ y_1(t) &= y_1^{(1)} + \epsilon(\delta y_1) \exp(\lambda_1 t) \\ y_2(t) &= y_2^{(1)} + \epsilon(\delta y_2) \exp(\lambda_1 t) \\ z(t) &= z^{(1)} + \epsilon(\delta z) \exp(\lambda_1 t) \end{aligned} \quad (26)$$

Here, we consider that  $\epsilon$  is arbitrarily small. Substituting Equations (26) into the equation for  $\dot{x}_2$  in Equations (8) and setting  $u_2 = 0$ , we have

$$\lambda_1 \alpha_2 \epsilon(\delta x_2) \exp(\lambda_1 t) = \left[ c \left( y_2^{(1)} + \epsilon(\delta y_2) \exp(\lambda_1 t) \right) - 1 \right] \epsilon(\delta x_2) \exp(\lambda_1 t)$$

Simplifying and keeping only terms of the lowest order in  $\epsilon$ , this becomes

$$\lambda_1 = \frac{c y_2^{(1)} - 1}{\alpha_2}$$

If  $\lambda_1 < 0$ , then  $E_1$  is dynamically stable, while if  $\lambda_1 > 0$ , then  $E_1$  is dynamically unstable. We can write  $\lambda_1$  in terms of  $p$  using Equation (22):

$$\lambda_1 = \frac{p - (c^2 + 1) + \sqrt{[p - (c^2 + 1)]^2 + 4p}}{2\alpha_2}$$

$\alpha_2$  is necessarily positive. If  $p = 0$ , then  $\lambda_1 = 0$ . If  $p < 0$ , then  $\lambda_1 < 0$ . If  $p > 0$ , then  $\lambda_1 > 0$ . Therefore,  $p$  is sufficient to characterize the dynamical stability of  $E_1$ :

- If  $p < 0$ , then  $E_1$  is dynamically stable.
- If  $p > 0$ , then  $E_1$  is dynamically unstable.

For determining the dynamical stability of Equilibrium  $E_2$ , we use the following:

$$\begin{aligned}
x_1(t) &= x_1^{(2)} + \epsilon(\delta x_1) \exp(\lambda_2 t) \\
x_2(t) &= x_2^{(2)} + \epsilon(\delta x_2) \exp(\lambda_2 t) \\
y_1(t) &= y_1^{(2)} + \epsilon(\delta y_1) \exp(\lambda_2 t) \\
y_2(t) &= y_2^{(2)} + \epsilon(\delta y_2) \exp(\lambda_2 t) \\
z(t) &= z^{(2)} + \epsilon(\delta z) \exp(\lambda_2 t)
\end{aligned} \tag{27}$$

Here, we consider that  $\epsilon$  is arbitrarily small. Substituting Equations (27) into the equation for  $\dot{x}_1$  in Equations (8) and setting  $u_1 = 0$ , we have

$$\begin{aligned}
\lambda_2 \alpha_1 \epsilon(\delta x_1) \exp(\lambda_2 t) &= \left[ \left( y_1^{(2)} + \epsilon(\delta y_1) \exp(\lambda_2 t) \right) \left( y_2^{(2)} + \epsilon(\delta y_2) \exp(\lambda_2 t) \right) - 1 \right] \\
&\quad \times \epsilon(\delta x_1) \exp(\lambda_2 t)
\end{aligned}$$

Simplifying and keeping only terms of the lowest order in  $\epsilon$ , this becomes

$$\lambda_2 = \frac{y_1^{(2)} y_2^{(2)} - 1}{\alpha_1}$$

If  $\lambda_2 < 0$ , then  $E_2$  is dynamically stable, while if  $\lambda_2 > 0$ , then  $E_2$  is dynamically unstable. We can write  $\lambda_2$  in terms of  $q$  using Equation (23):

$$\lambda_2 = \frac{q - (c^2 + bf_1) + \sqrt{[q - (c^2 + bf_1)]^2 + 4c^2q}}{2c^2\alpha_1}$$

$\alpha_1$  is necessarily positive. If  $q = 0$ , then  $\lambda_2 = 0$ . If  $q < 0$ , then  $\lambda_2 < 0$ . If  $q > 0$ , then  $\lambda_2 > 0$ . Therefore,  $q$  is sufficient to characterize the dynamical stability of  $E_2$ :

- If  $q < 0$ , then  $E_2$  is dynamically stable.
- If  $q > 0$ , then  $E_2$  is dynamically unstable.

Equilibrium  $\hat{E}$  can be either stable or unstable. Since there can only be one interior equilibrium, there are two cases for which it exists:

- $p > 0$  and  $q > 0$ . In this case,  $\hat{E}$  is dynamically stable.
- $p < 0$  and  $q < 0$ . In this case,  $\hat{E}$  is dynamically unstable.

## 1.5 Characterization of the system in steady state

The system in steady state can be understood by considering the values of  $p$  and  $q$  from Equations (22) and (23), respectively. We have the following possibilities:

- If  $p < 0$  and  $q > 0$ , then APB dominate.
- If  $p > 0$  and  $q < 0$ , then cyanobacteria dominate.
- If  $p > 0$  and  $q > 0$ , then there is stable coexistence.
- If  $p < 0$  and  $q < 0$ , then there is bistability.

For the interior equilibrium to be physical, we must have  $\hat{x}_1 > 0$  and  $\hat{x}_2 > 0$ . From the solutions for  $\hat{x}_1$  and  $\hat{x}_2$ , the key consideration for whether  $\hat{E}$  is stable or unstable is then whether  $r > 0$  or  $r < 0$ . If  $r > 0$ , then it is not possible to have  $p < 0$  and  $q < 0$ , but it is possible to have  $p > 0$  and  $q > 0$ . If  $r < 0$ , then it is not possible to have  $p > 0$  and  $q > 0$ , but it is possible to have  $p < 0$  and  $q < 0$ . Therefore, for  $r > 0$ ,  $\hat{E}$  is necessarily stable, while for  $r < 0$ ,  $\hat{E}$  is necessarily unstable.

The possibilities can be written as follows:

- For  $r > 0$ :
  - If  $p < 0$  and  $q > 0$ , then APB dominate.
  - If  $p > 0$  and  $q > 0$ , then there is stable coexistence.
  - If  $p > 0$  and  $q < 0$ , then cyanobacteria dominate.
- For  $r < 0$ :
  - If  $p < 0$  and  $q > 0$ , then APB dominate.
  - If  $p < 0$  and  $q < 0$ , then there is bistability.
  - If  $p > 0$  and  $q < 0$ , then cyanobacteria dominate.

## 1.6 Timing and nature of the GOE

Concerning the GOE, we can ask three basic questions: (1) What was the state of Earth's ecosystem before the GOE? (2) What is the condition that determines when the GOE was triggered? (3) Once the GOE began, was the resulting transition gradual or sudden?

1. Before the GOE, APB dominated over cyanobacteria, so  $p$  was necessarily negative.
2.  $p$  is a monotonically decreasing function of  $f_1$  and a monotonically increasing function of  $f_2$ . Therefore, a decreasing value of  $f_1$  and/or an increasing value of  $f_2$  can cause the pre-GOE equilibrium to become unstable. When  $f_1$  becomes sufficiently small and/or  $f_2$  becomes sufficiently large that  $p = 0$ , a GOE is triggered. Also, since  $p < 0$  when  $c = 0$ , and since  $p$  is a convex, quadratic function of  $c$ , an increasing value of  $c$  is another possible mechanism for triggering a GOE.  $p$  does not depend on  $a$  or  $b$ , so in the absence of migration of cyanobacteria, an increasing input rate of oxygen or a declining burying rate of oxygen cannot by themselves trigger a GOE.

3. When  $p = 0$ , the value of  $r$  determines the nature of the transition. If  $r > 0$ , then the GOE was characterized by stable coexistence of APB and cyanobacteria. As conditions continued becoming more favorable to cyanobacteria, the abundance of cyanobacteria gradually increased, while the abundance of APB gradually decreased. If  $r < 0$ , then the GOE was a rapid and dramatic change in Earth's ecosystem and environment.

A distinguishing feature of a gradual GOE is that, when  $p$  becomes positive, the abundance of cyanobacteria increases by many orders of magnitude before there is a significant drop in the abundance of APB. Cyanobacteria and APB both persist at high abundances until  $q$  becomes negative, at which point the abundance of APB decreases by many orders of magnitude (**Fig. 3a** and **Fig. S4a**). Moreover, the level of oxygenation depends on the current state of geophysical and biological parameters, not on their histories. In **Fig. S3a**, once  $f_1$  drops below  $f_1^*$ , there is a large increase in oxygen abundance, but a subsequent increase in  $f_1$  above  $f_1^*$  returns the system to the unoxygenated state.

If, instead, the GOE is a sudden transition, then the abundance of cyanobacteria increases at the same time that the abundance of APB decreases (**Fig. 5a** and **Fig. S5a**). Furthermore, the transition is irreversible—oxygenation is robust to moderate changes in parameter values. There is thus hysteresis. In **Fig. S3b**, once  $f_1$  drops below  $f_1^*$ , a GOE results, but a subsequent increase in  $f_1$  above  $f_1^*$  does not cause a reversion to the unoxygenated state.

If  $a < 1$ , then it is impossible to have  $r < 0$ , regardless of the values of  $b$  or  $c$ . This is because the small amount of dioxygen that is produced is consumed by rusting without significantly reducing the abundance of iron(II). Therefore, for  $a < 1$ , the GOE is necessarily gradual.

## 1.7 Causes of the GOE

The GOE can be caused by any combination of a decrease in  $f_1$ , an increase in  $f_2$ , or an increase in  $c$ . To understand each possibility individually, we consider the effects of holding two of these parameters constant while varying the remaining parameter.

### 1.7.1 Decreasing $f_1$

Iron(II) is needed for APB to reproduce. A decrease in the rate of supply of iron(II),  $f_1$ , diminishes the rate of reproduction of APB. Setting  $p = 0$  in Equation (22) and solving for  $f_1 = f_1^*$ , we have

$$f_1^* = f_2 + \frac{(c+1)(c-1)}{c} \quad (28)$$

Setting  $q = 0$  in Equation (23) and solving for  $f_1 = f_1'$ , we have

$$f_1' = c + \frac{a(cf_2 - 1)}{b + c} \quad (29)$$

Equations (28) and (29) specify two critical values of  $f_1$ . If  $f_1 > f_1^*$ , then  $E_1$  is stable, while if  $f_1 < f_1^*$ , then  $E_1$  is unstable. If  $f_1 > f_1'$ , then  $E_2$  is unstable, while if  $f_1 < f_1'$ , then  $E_2$  is stable. The effects of a decreasing value of  $f_1$  are shown in **Fig. 3b** and **Fig. 5b**.

### 1.7.2 Increasing $f_2$

Phosphate is needed for both APB and cyanobacteria to reproduce. An increase in  $f_2$  leads to an increase in the rates of reproduction of both types of bacteria, but eventually, iron becomes the limiting resource for reproduction of APB. Setting  $p = 0$  in Equation (22) and solving for  $f_2 = f_2^*$ , we have

$$f_2^* = f_1 - \frac{(c+1)(c-1)}{c} \quad (30)$$

Setting  $q = 0$  in Equation (23) and solving for  $f_2 = f_2'$ , we have

$$f_2' = \frac{a + (b+c)(f_1 - c)}{ac} \quad (31)$$

Equations (30) and (31) specify two critical values of  $f_2$ . If  $f_2 < f_2^*$ , then  $E_1$  is stable, while if  $f_2 > f_2^*$ , then  $E_1$  is unstable. If  $f_2 < f_2'$ , then  $E_2$  is unstable, while if  $f_2 > f_2'$ , then  $E_2$  is stable. The effects of an increasing value of  $f_2$  are shown in **Fig. S4b** and **Fig. S5b**.

### 1.7.3 Increasing $c$

Another possibility is that the GOE is caused by an increase in  $c$  (**Fig. S7a** and **Fig. S8a**). This could be due to geophysical or geochemical changes that are unrelated to the abundances of iron(II) or phosphate. Setting  $p = 0$  in Equation (22) and solving for  $c = c^*$ , we have

$$c^* = \frac{f_1 - f_2 + \sqrt{(f_1 - f_2)^2 + 4}}{2} \quad (32)$$

Setting  $q = 0$  in Equation (23) and solving for  $c = c'$ , we have

$$c' = \frac{f_1 - af_2 - b + \sqrt{(f_1 - af_2 - b)^2 + 4(a + bf_1)}}{2} \quad (33)$$

Equations (32) and (33) specify two critical values of  $c$ . If  $c < c^*$ , then  $E_1$  is stable, while if  $c > c^*$ , then  $E_1$  is unstable. If  $c < c'$ , then  $E_2$  is unstable, while if  $c > c'$ , then  $E_2$  is stable. The effects of an increasing value of  $c$  are shown in **Fig. S7b** and **Fig. S8b**.

## 1.8 Critical values of $a$ and $b$ for Equilibrium $E_2$

The dynamical stability of  $E_2$  is affected by the values of  $a$  and  $b$ . Setting  $q = 0$  in Equation (23) and solving for  $a = a'$ , we have

$$a' = (b+c) \left( \frac{f_1 - c}{cf_2 - 1} \right) \quad (34)$$

Equation (34) specifies a critical value of  $a$ . If  $a < a'$ , then  $E_2$  is unstable, while if  $a > a'$ , then  $E_2$  is stable.

Setting  $q = 0$  in Equation (23) and solving for  $b = b'$ , we have

$$b' = a \left( \frac{cf_2 - 1}{f_1 - c} \right) - c \quad (35)$$

Equation (35) specifies a critical value of  $b$ . If  $b > b'$ , then  $E_2$  is unstable, while if  $b < b'$ , then  $E_2$  is stable.

## 1.9 All possible transitions

The following transitions between stable equilibria are possible:

- From  $E_1$  ( $p < 0$ )
  - $r > 0$  with  $p$  increasing:  $E_1 \rightarrow \hat{E}$  when  $p = 0$
  - $r < 0$  with  $p$  increasing:  $E_1 \rightarrow E_2$  when  $p = 0$
- From  $\hat{E}$  ( $p > 0$  and  $q > 0$ )
  - $p$  decreasing:  $\hat{E} \rightarrow E_1$  when  $p = 0$
  - $q$  decreasing:  $\hat{E} \rightarrow E_2$  when  $q = 0$
- From  $E_2$  ( $q < 0$ )
  - $r > 0$  with  $q$  increasing:  $E_2 \rightarrow \hat{E}$  when  $q = 0$
  - $r < 0$  with  $q$  increasing:  $E_2 \rightarrow E_1$  when  $q = 0$

## 1.10 Migration of cyanobacteria

A decrease in  $f_1$ , an increase in  $f_2$ , or an increase in  $c$  can all cause  $p$ —given by Equation (22)—to become positive and trigger a GOE. For an arbitrarily small rate of migration of cyanobacteria,  $u_2$ , these causes of the GOE are independent of  $u_2$ ,  $a$ , and  $b$ . This is because the accumulation of oxygen due to migration of cyanobacteria is too small to cause any significant amount of rusting of iron.

However, if  $u_2$  is sufficiently large,  $a$  is sufficiently large, and  $b$  is sufficiently small, then rusting can no longer be neglected in the condition for the GOE. For  $\bar{x}_1 > 0$ , assuming  $u_1$  is arbitrarily small, we set  $u_1 = 0$  in Equations (15):

$$\begin{aligned}
 0 &= \tilde{y}_1 \tilde{y}_2 - 1 \\
 0 &= c \tilde{x}_2 \tilde{y}_2 - \tilde{x}_2 + u_2 \\
 0 &= f_1 - \tilde{y}_1 - \tilde{x}_1 \tilde{y}_1 \tilde{y}_2 - \tilde{y}_1 \tilde{z} \\
 0 &= f_2 - \tilde{y}_2 - \tilde{x}_1 \tilde{y}_1 \tilde{y}_2 - \tilde{x}_2 \tilde{y}_2 \\
 0 &= a \tilde{x}_2 \tilde{y}_2 - b \tilde{z} - \tilde{y}_1 \tilde{z}
 \end{aligned} \tag{36}$$

Eliminating  $\tilde{x}_1$ ,  $\tilde{x}_2$ ,  $\tilde{y}_1$ , and  $\tilde{z}$  from Equations (36), we have

$$0 = \psi(f_1, f_2, c, a, b, u_2, \tilde{y}_2) \tag{37}$$

$\psi(f_1, f_2, c, a, b, u_2, \tilde{y}_2)$  in Equation (37) is given by

$$\psi(f_1, f_2, c, a, b, u_2, \tilde{y}_2) = k_0 + k_1 \tilde{y}_2 + k_2 (\tilde{y}_2)^2 + k_3 (\tilde{y}_2)^3 + k_4 (\tilde{y}_2)^4$$

The coefficients are given by

$$\begin{aligned}
k_0 &= 1 \\
k_1 &= f_2 - f_1 + b - c \\
k_2 &= (f_2 - f_1)(b - c) - bc - 1 + (a - 1)u_2 \\
k_3 &= c - b - bc(f_2 - f_1) - bu_2 \\
k_4 &= bc
\end{aligned}$$

For understanding the possibility of a GOE, we must consider the values of  $\tilde{y}_2$  obtained from solving  $\psi(f_1, f_2, c, a, b, u_2, \tilde{y}_2) = 0$ . If the GOE is gradual, then there is one stable equilibrium. As  $f_1$  decreases,  $f_2$  increases,  $c$  increases,  $a$  increases,  $b$  decreases, or  $u_2$  increases, this fixed point corresponds to a decreasing equilibrium value of  $\tilde{x}_1$  and an increasing equilibrium value of  $\tilde{x}_2$  (**Fig. 4**).

If the GOE is sudden, then as  $f_1$  decreases,  $f_2$  increases,  $c$  increases,  $a$  increases,  $b$  decreases, or  $u_2$  increases, an unstable interior equilibrium appears (**Fig. 6**). Just before a sudden rise in atmospheric oxygen occurs, there are two fixed points of the dynamics that are arbitrarily close to each other in phase space. If parameters change slightly, then there can be a saddle-node bifurcation, where  $\psi(f_1, f_2, c, a, b, u_2, \tilde{y}_2)$  has a double root for  $\tilde{y}_2$ . When this double root exists, the discriminant of the quartic polynomial  $\psi(f_1, f_2, c, a, b, u_2, \tilde{y}_2)$ , denoted by  $\Delta(f_1, f_2, c, a, b, u_2)$ , is equal to zero.

A decreasing  $f_1$ , an increasing  $f_2$ , or an increasing  $c$  can cause a GOE, leading to the following three equations:

$$0 = \Delta(f_1^*, f_2, c, a, b, u_2) \quad (38)$$

$$0 = \Delta(f_1, f_2^*, c, a, b, u_2) \quad (39)$$

$$0 = \Delta(f_1, f_2, c^*, a, b, u_2) \quad (40)$$

The critical values of  $f_1$ ,  $f_2$ , and  $c$  for triggering a GOE are solutions to Equations (38), (39), and (40), respectively.  $f_1^*$ ,  $f_2^*$ , and  $c^*$  are approximately given by Equations (28), (30), and (32), respectively, if  $u_2$  is sufficiently small,  $a$  is sufficiently small, and  $b$  is sufficiently large (**Fig. S6**). Moreover, since  $\Delta(f_1, f_2, c, a, b, u_2)$  is also a function of  $a$ ,  $b$ , and  $u_2$ , a sufficiently large value of  $a$ , a sufficiently small value of  $b$ , and a sufficiently large value of  $u_2$  are each capable of triggering a GOE. This leads to the following three equations:

$$0 = \Delta(f_1, f_2, c, a^*, b, u_2) \quad (41)$$

$$0 = \Delta(f_1, f_2, c, a, b^*, u_2) \quad (42)$$

$$0 = \Delta(f_1, f_2, c, a, b, u_2^*) \quad (43)$$

The critical values of  $a$ ,  $b$ , and  $u_2$  for triggering a GOE are solutions to Equations (41), (42), and (43), respectively.

For a declining  $b$  to be able to cause a GOE,  $a$  must be sufficiently large. This leads to the following equation:

$$0 = \Delta(f_1, f_2, c, \eta, 0, u_2) \quad (44)$$

The critical value of  $a$ , denoted by  $\eta$ , for which a declining  $b$  is able to cause a GOE is a solution to Equation (44). If  $a > \eta$ , then the critical value of  $b$  for triggering a GOE is given by  $b^*$ . But if  $a < \eta$ , then a declining  $b$  cannot trigger a GOE.



We can solve approximately for  $\eta$ . In Equations (36), we set  $b = 0$ , and we make the substitution  $\tilde{x}_1 \rightarrow \chi$ , where  $\chi = x_1^{(1)}$  from Equations (18):

$$\chi = \frac{f_1 + f_2 - \sqrt{(f_1 - f_2)^2 + 4}}{2} \quad (45)$$

We have

$$\begin{aligned} 0 &\approx \tilde{y}'_1 \tilde{y}'_2 - 1 \\ 0 &\approx c \tilde{x}'_2 \tilde{y}'_2 - \tilde{x}'_2 + u_2 \\ 0 &\approx f_1 - \tilde{y}'_1 - \chi \tilde{y}'_1 \tilde{y}'_2 - \tilde{y}'_1 \tilde{z}' \\ 0 &\approx a \tilde{x}'_2 \tilde{y}'_2 - \tilde{y}'_1 \tilde{z}' \end{aligned} \quad (46)$$

Eliminating  $\tilde{x}'_2$ ,  $\tilde{y}'_1$ , and  $\tilde{z}'$  from Equations (46), we have

$$0 \approx 1 - (f_1 - \chi + c) \tilde{y}'_2 + [c(f_1 - \chi) + au_2] (\tilde{y}'_2)^2 \quad (47)$$

The discriminant of the quadratic polynomial on the right-hand side of Equation (47) is equal to zero if  $a = \eta$ , where

$$\eta = \frac{(f_1 - \chi - c)^2}{4u_2} \quad (48)$$

We can also solve approximately for  $a^*$  and  $b^*$ . To do this, we set  $a = \eta$  and  $\tilde{y}_1 = \Upsilon$  in Equations (46), we eliminate  $\tilde{x}_2$ ,  $\tilde{y}_2$ , and  $\tilde{z}$ , we substitute Equation (48), and we solve for  $\Upsilon$ :

$$\Upsilon = \frac{f_1 - \chi + c}{2} \quad (49)$$

Then, in Equations (36), we make the substitution  $\tilde{x}_1 \rightarrow \chi$ , and in the rusting terms ( $\tilde{y}_1 \tilde{z}$ ) in the third and fifth of Equations (36), we make the substitution  $\tilde{y}_1 \rightarrow \Upsilon$ :

$$\begin{aligned} 0 &\approx \tilde{y}_1 \tilde{y}_2 - 1 \\ 0 &\approx c \tilde{x}_2 \tilde{y}_2 - \tilde{x}_2 + u_2 \\ 0 &\approx f_1 - \tilde{y}_1 - \chi \tilde{y}_1 \tilde{y}_2 - \Upsilon \tilde{z} \\ 0 &\approx a \tilde{x}_2 \tilde{y}_2 - (b + \Upsilon) \tilde{z} \end{aligned} \quad (50)$$

Eliminating  $\tilde{x}_2$ ,  $\tilde{y}_1$ , and  $\tilde{z}$  from Equations (50), we have

$$0 \approx (b + \Upsilon) - (f_1 - \chi + c)(b + \Upsilon) \tilde{y}_2 + [c(f_1 - \chi)(b + \Upsilon) + \Upsilon au_2] (\tilde{y}_2)^2 \quad (51)$$

The discriminant of the quadratic polynomial on the right-hand side of Equation (51) is equal to zero if  $a = \alpha$ , where

$$\alpha = \eta \left( 1 + \frac{b}{\Upsilon} \right) \quad (52)$$

Similarly, this discriminant is equal to zero if  $b = \beta$ , where

$$\beta = (a - \eta) \left( \frac{\Upsilon}{\eta} \right) \quad (53)$$

The critical values  $a^*$  and  $b^*$  for triggering a GOE are approximately given by  $\alpha$  and  $\beta$ , respectively, from Equations (52) and (53), with  $\Upsilon$  given by Equation (49),  $\eta$  given by Equation (48), and  $\chi$  given by Equation (45) (**Fig. S11**).

If a GOE is caused by an increase in  $a$ , a reduction in  $b$ , or an increase in  $u_2$ , then the resulting transformation is necessarily discontinuous. This is because  $E_2$ —characterized by abundance of oxygen—gains stability first, and as  $a$  continues to rise,  $b$  continues to drop, or  $u_2$  continues to rise, the unstable interior equilibrium moves toward  $E_1$  in phase space until a saddle-node bifurcation occurs.

**Fig. S9** shows a GOE caused by a rising production rate of oxygen. **Fig. S10** shows a GOE caused by a declining burial rate of oxygen.

### 1.11 Corrections to the fixed points due to migration

For  $u_1 > 0$  and  $u_2 > 0$ , the fixed points,  $(\bar{x}_1, \bar{x}_2, \bar{y}_1, \bar{y}_2, \bar{z})$ , are given by Equations (15). For sufficiently small values of  $u_1$  and  $u_2$ , we can treat  $u_1$  and  $u_2$  as perturbations. We can express  $(\bar{x}_1, \bar{x}_2, \bar{y}_1, \bar{y}_2, \bar{z})$  as

$$\begin{aligned}\bar{x}_1 &= \bar{x}_1 + \delta x_1 \\ \bar{x}_2 &= \bar{x}_2 + \delta x_2 \\ \bar{y}_1 &= \bar{y}_1 + \delta y_1 \\ \bar{y}_2 &= \bar{y}_2 + \delta y_2 \\ \bar{z} &= \bar{z} + \delta z\end{aligned}\tag{54}$$

Here,  $(\delta x_1, \delta x_2, \delta y_1, \delta y_2, \delta z)$  represent corrections to  $(\bar{x}_1, \bar{x}_2, \bar{y}_1, \bar{y}_2, \bar{z})$  due to the migration rates,  $u_1$  and  $u_2$ . Substituting Equations (54) into Equations (15), we obtain

$$\begin{pmatrix} -u_1 \\ -u_2 \\ 0 \\ 0 \\ 0 \end{pmatrix} \approx \begin{pmatrix} (\bar{y}_1\bar{y}_2 - 1) & 0 & \bar{x}_1\bar{y}_2 & \bar{x}_1\bar{y}_1 & 0 \\ 0 & (c\bar{y}_2 - 1) & 0 & c\bar{x}_2 & 0 \\ -\bar{y}_1\bar{y}_2 & 0 & -(1 + \bar{z} + \bar{x}_1\bar{y}_2) & -\bar{x}_1\bar{y}_1 & -\bar{y}_1 \\ -\bar{y}_1\bar{y}_2 & -\bar{y}_2 & -\bar{x}_1\bar{y}_2 & -(1 + \bar{x}_2 + \bar{x}_1\bar{y}_1) & 0 \\ 0 & a\bar{y}_2 & -\bar{z} & a\bar{x}_2 & -(b + \bar{y}_1) \end{pmatrix} \begin{pmatrix} \delta x_1 \\ \delta x_2 \\ \delta y_1 \\ \delta y_2 \\ \delta z \end{pmatrix}\tag{55}$$

Equations (55) can be solved to obtain approximations for  $(\delta x_1, \delta x_2, \delta y_1, \delta y_2, \delta z)$ .

### 1.12 Effects of migration rates

For sufficiently small values of  $u_1$  and  $u_2$ , the calculations for timing and duration of the GOE are robust to changes in the migration rates. **Fig. S12** shows a continuous transition for different values of  $u_1$  and  $u_2$ . **Fig. S13** shows a discontinuous transition for different values of  $u_1$  and  $u_2$ .

The value of  $u_1$  determines the magnitude of the decline in APB,  $x_1$ . This is given by

$$\frac{x_1^{(1)}}{\delta x_1|_{E_2}} = \frac{x_1^{(1)} \left(1 - y_1^{(2)} y_2^{(2)}\right)}{u_1} \quad (56)$$

From Equation (56), the magnitude of the decline in APB is inversely proportional to  $u_1$ .

The value of  $u_2$  determines the magnitude of the rise in cyanobacteria,  $x_2$ , and the magnitude of the rise in oxygen,  $z$ . These are given by

$$\frac{x_2^{(2)}}{\delta x_2|_{E_1}} = \frac{x_2^{(2)} \left(1 - cy_2^{(1)}\right)}{u_2} \quad (57)$$

$$\frac{z^{(2)}}{\delta z|_{E_1}} = \frac{z^{(2)} \left(1 - cy_2^{(1)}\right) \left(b + y_1^{(1)}\right)}{ay_2^{(1)}u_2} \quad (58)$$

From Equations (57) and (58), the magnitude of the rise in cyanobacteria and the magnitude of the rise in oxygen are inversely proportional to  $u_2$ .

## 2 Supplementary Note 2: Bounded bacterial growth rates

In Equations (1), the growth rates of APB and cyanobacteria are unbounded. The growth rates of both types of bacteria are proportional to the abundance of phosphate, and the growth rate of APB is also proportional to the abundance of iron(II). It is more realistic to model these growth rates as being bounded. To do this, we consider the following equations:

$$\begin{aligned} \frac{dX_1}{dT} &= C_1 X_1 \left( \frac{Y_1}{1 + MY_1} \right) \left( \frac{Y_2}{1 + N_1 Y_2} \right) - D_1 X_1 + U_1 \\ \frac{dX_2}{dT} &= C_2 X_2 \left( \frac{Y_2}{1 + N_2 Y_2} \right) - D_2 X_2 + U_2 \\ \frac{dY_1}{dT} &= F_1 - G_1 Y_1 - H X_1 \left( \frac{Y_1}{1 + MY_1} \right) \left( \frac{Y_2}{1 + N_1 Y_2} \right) - R_1 Y_1 Z \\ \frac{dY_2}{dT} &= F_2 - G_2 Y_2 - H_1 X_1 \left( \frac{Y_1}{1 + MY_1} \right) \left( \frac{Y_2}{1 + N_1 Y_2} \right) - H_2 X_2 \left( \frac{Y_2}{1 + N_2 Y_2} \right) \\ \frac{dZ}{dT} &= A X_2 \left( \frac{Y_2}{1 + N_2 Y_2} \right) - B Z - R Y_1 Z \end{aligned} \quad (59)$$

For small  $Y_1$ , the factor  $Y_1/(1 + MY_1)$  is approximately equal to  $Y_1$ , but as  $Y_1$  becomes large, this factor approaches a maximum value of  $1/M$ . For small  $Y_2$ , the factor  $Y_2/(1 + N_1 Y_2)$  is approximately equal to  $Y_2$ , but as  $Y_2$  becomes large, this factor approaches a maximum value of  $1/N_1$ . For small  $Y_2$ , the factor  $Y_2/(1 + N_2 Y_2)$  is approximately equal to  $Y_2$ , but as  $Y_2$  becomes large, this factor approaches a maximum value of  $1/N_2$ . To simplify Equations (59), we make the

following definitions:

$$\begin{aligned}
m &\equiv \frac{D_1 M}{k C_1} \\
n_1 &\equiv k N_1 \\
n_2 &\equiv k N_2
\end{aligned} \tag{60}$$

Substituting Equations (6), (7), and (60) into Equations (59), we obtain

$$\begin{aligned}
\alpha_1 \dot{x}_1 &= x_1 \left( \frac{y_1}{1 + m y_1} \right) \left( \frac{y_2}{1 + n_1 y_2} \right) - x_1 + u_1 \\
\alpha_2 \dot{x}_2 &= c x_2 \left( \frac{y_2}{1 + n_2 y_2} \right) - x_2 + u_2 \\
\beta_1 \dot{y}_1 &= f_1 - y_1 - x_1 \left( \frac{y_1}{1 + m y_1} \right) \left( \frac{y_2}{1 + n_1 y_2} \right) - y_1 z \\
\beta_2 \dot{y}_2 &= f_2 - y_2 - x_1 \left( \frac{y_1}{1 + m y_1} \right) \left( \frac{y_2}{1 + n_1 y_2} \right) - x_2 \left( \frac{y_2}{1 + n_2 y_2} \right) \\
\dot{z} &= a x_2 \left( \frac{y_2}{1 + n_2 y_2} \right) - b z - y_1 z
\end{aligned} \tag{61}$$

For studying the ecological dynamics, without loss of generality, we consider Equations (61).

The fixed points of the ecological dynamics are obtained from the steady state of Equations (61):

$$\begin{aligned}
0 &= \bar{x}_1 \left( \frac{\bar{y}_1}{1 + m \bar{y}_1} \right) \left( \frac{\bar{y}_2}{1 + n_1 \bar{y}_2} \right) - \bar{x}_1 + u_1 \\
0 &= c \bar{x}_2 \left( \frac{\bar{y}_2}{1 + n_2 \bar{y}_2} \right) - \bar{x}_2 + u_2 \\
0 &= f_1 - \bar{y}_1 - \bar{x}_1 \left( \frac{\bar{y}_1}{1 + m \bar{y}_1} \right) \left( \frac{\bar{y}_2}{1 + n_1 \bar{y}_2} \right) - \bar{y}_1 \bar{z} \\
0 &= f_2 - \bar{y}_2 - \bar{x}_1 \left( \frac{\bar{y}_1}{1 + m \bar{y}_1} \right) \left( \frac{\bar{y}_2}{1 + n_1 \bar{y}_2} \right) - \bar{x}_2 \left( \frac{\bar{y}_2}{1 + n_2 \bar{y}_2} \right) \\
0 &= a \bar{x}_2 \left( \frac{\bar{y}_2}{1 + n_2 \bar{y}_2} \right) - b \bar{z} - \bar{y}_1 \bar{z}
\end{aligned} \tag{62}$$

We solve for the fixed points of Equations (61) without loss of generality by considering Equations (62).

Setting  $u_1 = u_2 = 0$  in Equations (62), we have

$$\begin{aligned}
0 &= \left[ \left( \frac{\bar{y}_1}{1 + m\bar{y}_1} \right) \left( \frac{\bar{y}_2}{1 + n_1\bar{y}_2} \right) - 1 \right] \bar{x}_1 \\
0 &= \left[ c \left( \frac{\bar{y}_2}{1 + n_2\bar{y}_2} \right) - 1 \right] \bar{x}_2 \\
0 &= f_1 - \bar{y}_1 - \bar{x}_1 \left( \frac{\bar{y}_1}{1 + m\bar{y}_1} \right) \left( \frac{\bar{y}_2}{1 + n_1\bar{y}_2} \right) - \bar{y}_1 \bar{z} \\
0 &= f_2 - \bar{y}_2 - \bar{x}_1 \left( \frac{\bar{y}_1}{1 + m\bar{y}_1} \right) \left( \frac{\bar{y}_2}{1 + n_1\bar{y}_2} \right) - \bar{x}_2 \left( \frac{\bar{y}_2}{1 + n_2\bar{y}_2} \right) \\
0 &= a\bar{x}_2 \left( \frac{\bar{y}_2}{1 + n_2\bar{y}_2} \right) - b\bar{z} - \bar{y}_1 \bar{z}
\end{aligned} \tag{63}$$

We set  $\bar{x}_2 = 0$  with  $\bar{x}_1 > 0$  in Equations (63) to calculate the fixed point for which cyanobacteria are extinct but APB are abundant. We have

$$\begin{aligned}
0 &= \left( \frac{y_1^{(1)}}{1 + my_1^{(1)}} \right) \left( \frac{y_2^{(1)}}{1 + n_1y_2^{(1)}} \right) - 1 \\
0 &= x_2^{(1)} \\
0 &= f_1 - y_1^{(1)} - x_1^{(1)} \left( \frac{y_1^{(1)}}{1 + my_1^{(1)}} \right) \left( \frac{y_2^{(1)}}{1 + n_1y_2^{(1)}} \right) - y_1^{(1)} z^{(1)} \\
0 &= f_2 - y_2^{(1)} - x_1^{(1)} \left( \frac{y_1^{(1)}}{1 + my_1^{(1)}} \right) \left( \frac{y_2^{(1)}}{1 + n_1y_2^{(1)}} \right) - x_2^{(1)} \left( \frac{y_2^{(1)}}{1 + n_2y_2^{(1)}} \right) \\
0 &= ax_2^{(1)} \left( \frac{y_2^{(1)}}{1 + n_2y_2^{(1)}} \right) - bz^{(1)} - y_1^{(1)} z^{(1)}
\end{aligned} \tag{64}$$

From Equations (64), we have

$$0 = (1 - mn_1) \left( y_1^{(1)} \right)^2 + [(f_2 - f_1)(1 - mn_1) - m - n_1] y_1^{(1)} - [1 + (f_2 - f_1)n_1]$$

Solving this quadratic equation for  $y_1^{(1)}$ , keeping the physical solution, and substituting this into Equations (64), we obtain Equilibrium  $E_1$ :

$$\begin{aligned}
x_1^{(1)} &= \frac{(f_1 + f_2)(1 - mn_1) - m - n_1 - \sqrt{[(f_1 - f_2)(1 - mn_1) + m - n_1]^2 + 4}}{2(1 - mn_1)} \\
x_2^{(1)} &= 0 \\
y_1^{(1)} &= \frac{(f_1 - f_2)(1 - mn_1) + m + n_1 + \sqrt{[(f_1 - f_2)(1 - mn_1) + m - n_1]^2 + 4}}{2(1 - mn_1)} \\
y_2^{(1)} &= \frac{(f_2 - f_1)(1 - mn_1) + m + n_1 + \sqrt{[(f_1 - f_2)(1 - mn_1) + m - n_1]^2 + 4}}{2(1 - mn_1)} \\
z^{(1)} &= 0
\end{aligned} \tag{65}$$

We set  $\bar{x}_1 = 0$  with  $\bar{x}_2 > 0$  in Equations (63) to calculate the fixed point for which APB are extinct but cyanobacteria are abundant. We have

$$\begin{aligned}
0 &= x_1^{(2)} \\
0 &= c \left( \frac{y_2^{(2)}}{1 + n_2 y_2^{(2)}} \right) - 1 \\
0 &= f_1 - y_1^{(2)} - x_1^{(2)} \left( \frac{y_1^{(2)}}{1 + m y_1^{(2)}} \right) \left( \frac{y_2^{(2)}}{1 + n_1 y_2^{(2)}} \right) - y_1^{(2)} z^{(2)} \\
0 &= f_2 - y_2^{(2)} - x_1^{(2)} \left( \frac{y_1^{(2)}}{1 + m y_1^{(2)}} \right) \left( \frac{y_2^{(2)}}{1 + n_1 y_2^{(2)}} \right) - x_2^{(2)} \left( \frac{y_2^{(2)}}{1 + n_2 y_2^{(2)}} \right) \\
0 &= a x_2^{(2)} \left( \frac{y_2^{(2)}}{1 + n_2 y_2^{(2)}} \right) - b z^{(2)} - y_1^{(2)} z^{(2)}
\end{aligned} \tag{66}$$

Simplifying Equations (66), we obtain Equilibrium  $E_2$ :

$$\begin{aligned}
x_1^{(2)} &= 0 \\
x_2^{(2)} &= \frac{c[f_2(c - n_2) - 1]}{c - n_2} \\
y_1^{(2)} &= \frac{1}{2(c - n_2)} \left[ (c - n_2)(f_1 - b) - a[(c - n_2)f_2 - 1] \right. \\
&\quad \left. + \sqrt{\{(c - n_2)(f_1 - b) - a[(c - n_2)f_2 - 1]\}^2 + 4b(c - n_2)^2 f_1} \right] \\
y_2^{(2)} &= \frac{1}{c - n_2} \\
z^{(2)} &= \frac{1}{2b(c - n_2)} \left[ a[(c - n_2)f_2 - 1] - (c - n_2)(f_1 + b) \right. \\
&\quad \left. + \sqrt{\{(c - n_2)(f_1 - b) - a[(c - n_2)f_2 - 1]\}^2 + 4b(c - n_2)^2 f_1} \right]
\end{aligned} \tag{67}$$

The interior equilibrium corresponds to having both  $\bar{x}_1 > 0$  and  $\bar{x}_2 > 0$  in Equations (63). We have

$$\begin{aligned}
0 &= \left( \frac{\hat{y}_1}{1 + m \hat{y}_1} \right) \left( \frac{\hat{y}_2}{1 + n_1 \hat{y}_2} \right) - 1 \\
0 &= c \left( \frac{\hat{y}_2}{1 + n_2 \hat{y}_2} \right) - 1 \\
0 &= f_1 - \hat{y}_1 - \hat{x}_1 \left( \frac{\hat{y}_1}{1 + m \hat{y}_1} \right) \left( \frac{\hat{y}_2}{1 + n_1 \hat{y}_2} \right) - \hat{y}_1 \hat{z} \\
0 &= f_2 - \hat{y}_2 - \hat{x}_1 \left( \frac{\hat{y}_1}{1 + m \hat{y}_1} \right) \left( \frac{\hat{y}_2}{1 + n_1 \hat{y}_2} \right) - \hat{x}_2 \left( \frac{\hat{y}_2}{1 + n_2 \hat{y}_2} \right) \\
0 &= a \hat{x}_2 \left( \frac{\hat{y}_2}{1 + n_2 \hat{y}_2} \right) - b \hat{z} - \hat{y}_1 \hat{z}
\end{aligned} \tag{68}$$

The equations for the interior equilibrium are written most simply by defining  $p'$ ,  $q'$ , and  $r'$ . For  $p'$ , we have

$$p' = (c - n_2)\{(c - n_2 + n_1) - (f_1 - f_2)[1 - m(c - n_2 + n_1)]\} - [1 - m(c - n_2 + n_1)] \quad (69)$$

For  $q'$ , we have

$$\begin{aligned} q' &= \{b[1 - m(c - n_2 + n_1)] + (c - n_2 + n_1)\}\{f_1[1 - m(c - n_2 + n_1)] - (c - n_2 + n_1)\} \\ &\quad \times (c - n_2) \\ &\quad - a[(c - n_2)f_2 - 1][1 - m(c - n_2 + n_1)](c - n_2 + n_1) \end{aligned} \quad (70)$$

For  $r'$ , we have

$$r' = b[1 - m(c - n_2 + n_1)] - (c - n_2 + n_1)(a - 1) \quad (71)$$

Simplifying Equations (68), we obtain Equilibrium  $\hat{E}$ :

$$\begin{aligned} \hat{x}_1 &= \left( \frac{1}{(c - n_2)[1 - m(c - n_2 + n_1)]} \right) \left( \frac{q'}{r'} \right) \\ \hat{x}_2 &= \left( \frac{c\{b[1 - m(c - n_2 + n_1)] + (c - n_2 + n_1)\}}{(c - n_2)[1 - m(c - n_2 + n_1)]} \right) \left( \frac{p'}{r'} \right) \\ \hat{y}_1 &= \frac{c - n_2 + n_1}{1 - m(c - n_2 + n_1)} \\ \hat{y}_2 &= \frac{1}{c - n_2} \\ \hat{z} &= \left( \frac{a}{c - n_2} \right) \left( \frac{p'}{r'} \right) \end{aligned} \quad (72)$$

## 2.1 Dynamical stability

For determining the dynamical stability of Equilibrium  $E_1$ , we use the following:

$$\begin{aligned} x_1(t) &= x_1^{(1)} + \epsilon(\delta x_1) \exp(\lambda_1 t) \\ x_2(t) &= x_2^{(1)} + \epsilon(\delta x_2) \exp(\lambda_1 t) \\ y_1(t) &= y_1^{(1)} + \epsilon(\delta y_1) \exp(\lambda_1 t) \\ y_2(t) &= y_2^{(1)} + \epsilon(\delta y_2) \exp(\lambda_1 t) \\ z(t) &= z^{(1)} + \epsilon(\delta z) \exp(\lambda_1 t) \end{aligned} \quad (73)$$

Here, we consider that  $\epsilon$  is arbitrarily small. Substituting Equations (73) into the equation for  $\dot{x}_2$  in Equations (61) and setting  $u_2 = 0$ , we have

$$\lambda_1 \alpha_2 \epsilon (\delta x_2) \exp(\lambda_1 t) = \left[ \frac{c \left( y_2^{(1)} + \epsilon(\delta y_2) \exp(\lambda_1 t) \right)}{1 + n_2 \left( y_2^{(1)} + \epsilon(\delta y_2) \exp(\lambda_1 t) \right)} - 1 \right] \epsilon (\delta x_2) \exp(\lambda_1 t)$$

Simplifying and keeping only terms of the lowest order in  $\epsilon$ , this becomes

$$\lambda_1 = \frac{1}{\alpha_2} \left( \frac{cy_2^{(1)}}{1 + n_2 y_2^{(1)}} - 1 \right)$$

This can be rewritten as

$$\lambda_1 = \frac{(c - n_2)y_2^{(1)} - 1}{(1 + n_2 y_2^{(1)}) \alpha_2}$$

If  $\lambda_1 < 0$ , then  $E_1$  is dynamically stable, while if  $\lambda_1 > 0$ , then  $E_1$  is dynamically unstable. We can write  $\lambda_1$  in terms of  $p'$  using Equation (69):

$$\begin{aligned} \lambda_1 = & \left( \frac{1}{2(1 - mn_1)[1 - m(c - n_2 + n_1)] (1 + n_2 y_2^{(1)}) \alpha_2} \right) \\ & \times \left\{ (1 - mn_1)p' - \{(c - n_2)^2 + [1 - m(c - n_2 + n_1)]^2\} \right. \\ & + \text{sgn}(c - n_2)\text{sgn}(1 - m(c - n_2 + n_1)) \\ & \times \left[ \left( (1 - mn_1)p' - \{(c - n_2)^2 + [1 - m(c - n_2 + n_1)]^2\} \right)^2 \right. \\ & \left. \left. + 4(1 - mn_1)[1 - m(c - n_2 + n_1)]^2 p' \right]^{1/2} \right\} \end{aligned} \quad (74)$$

The first of Equations (64) yields

$$1 - mn_1 > 0$$

The dynamical stability of  $E_1$  is determined from Equation (74) as follows:

- If  $c - n_2 < 0$ , then  $E_1$  is dynamically stable.
- If  $c - n_2 > 0$  and  $1 - m(c - n_2 + n_1) > 0$  and  $p' < 0$ , then  $E_1$  is dynamically stable.
- If  $c - n_2 > 0$  and  $1 - m(c - n_2 + n_1) > 0$  and  $p' > 0$ , then  $E_1$  is dynamically unstable.
- If  $1 - m(c - n_2 + n_1) < 0$ , then  $E_1$  is dynamically unstable.

For determining the dynamical stability of Equilibrium  $E_2$ , we use the following:

$$\begin{aligned} x_1(t) &= x_1^{(2)} + \epsilon(\delta x_1) \exp(\lambda_2 t) \\ x_2(t) &= x_2^{(2)} + \epsilon(\delta x_2) \exp(\lambda_2 t) \\ y_1(t) &= y_1^{(2)} + \epsilon(\delta y_1) \exp(\lambda_2 t) \\ y_2(t) &= y_2^{(2)} + \epsilon(\delta y_2) \exp(\lambda_2 t) \\ z(t) &= z^{(2)} + \epsilon(\delta z) \exp(\lambda_2 t) \end{aligned} \quad (75)$$



Here, we consider that  $\epsilon$  is arbitrarily small. Substituting Equations (75) into the equation for  $\dot{x}_1$  in Equations (61) and setting  $u_1 = 0$ , we have

$$\lambda_2 \alpha_1 \epsilon (\delta x_1) \exp(\lambda_2 t) = \left[ \left( \frac{y_1^{(2)} + \epsilon (\delta y_1) \exp(\lambda_2 t)}{1 + m (y_1^{(2)} + \epsilon (\delta y_1) \exp(\lambda_2 t))} \right) \times \left( \frac{y_2^{(2)} + \epsilon (\delta y_2) \exp(\lambda_2 t)}{1 + n_1 (y_2^{(2)} + \epsilon (\delta y_2) \exp(\lambda_2 t))} \right) - 1 \right] \epsilon (\delta x_1) \exp(\lambda_2 t)$$

Simplifying and keeping only terms of the lowest order in  $\epsilon$ , this becomes

$$\lambda_2 = \frac{1}{\alpha_1} \left[ \left( \frac{y_1^{(2)}}{1 + m y_1^{(2)}} \right) \left( \frac{y_2^{(2)}}{1 + n_1 y_2^{(2)}} \right) - 1 \right]$$

This can be rewritten as

$$\lambda_2 = \frac{(1 - m n_1) y_1^{(2)} y_2^{(2)} - m y_1^{(2)} - n_1 y_2^{(2)} - 1}{(1 + m y_1^{(2)}) (1 + n_1 y_2^{(2)}) \alpha_1}$$

If  $\lambda_2 < 0$ , then  $E_2$  is dynamically stable, while if  $\lambda_2 > 0$ , then  $E_2$  is dynamically unstable. We can write  $\lambda_2$  in terms of  $q'$  using Equation (70):

$$\begin{aligned} \lambda_2 = & \left( \frac{1}{2(c - n_2)^2 (c - n_2 + n_1) (1 + m y_1^{(2)}) (1 + n_1 y_2^{(2)}) \alpha_1} \right) \\ & \times \left\{ q' - (c - n_2) \{ (c - n_2 + n_1)^2 + b f_1 [1 - m(c - n_2 + n_1)]^2 \} \right. \\ & + \text{sgn}(1 - m(c - n_2 + n_1)) \\ & \times \left[ \left( q' - (c - n_2) \{ (c - n_2 + n_1)^2 + b f_1 [1 - m(c - n_2 + n_1)]^2 \} \right)^2 \right. \\ & \left. \left. + 4(c - n_2)(c - n_2 + n_1)^2 q' \right]^{1/2} \right\} \end{aligned} \quad (76)$$

The second of Equations (66) yields

$$c - n_2 > 0$$

The dynamical stability of  $E_2$  is determined from Equation (76) as follows:

- If  $1 - m(c - n_2 + n_1) < 0$ , then  $E_2$  is dynamically stable.
- If  $1 - m(c - n_2 + n_1) > 0$  and  $q' < 0$ , then  $E_2$  is dynamically stable.
- If  $1 - m(c - n_2 + n_1) > 0$  and  $q' > 0$ , then  $E_2$  is dynamically unstable.

Equilibrium  $\hat{E}$  can be either stable or unstable. Since there can only be one interior equilibrium, there are two cases for which it exists:

- $E_1$  and  $E_2$  are both dynamically unstable. In this case,  $\hat{E}$  is dynamically stable.
- $E_1$  and  $E_2$  are both dynamically stable. In this case,  $\hat{E}$  is dynamically unstable.

## 2.2 Characterization of the interior equilibrium

For the interior equilibrium to be physical, we must have  $\hat{x}_1 > 0$  and  $\hat{x}_2 > 0$ . The equations for  $\hat{y}_1$  and  $\hat{y}_2$  from Equations (72) also require that  $c - n_2 > 0$  and  $1 - m(c - n_2 + n_1) > 0$ . From the solutions for  $\hat{x}_1$  and  $\hat{x}_2$ , the key consideration for whether  $\hat{E}$  is stable or unstable is then whether  $r' > 0$  or  $r' < 0$ . If  $r' > 0$ , then it is not possible to have  $p' < 0$  and  $q' < 0$ , but it is possible to have  $p' > 0$  and  $q' > 0$ . If  $r' < 0$ , then it is not possible to have  $p' > 0$  and  $q' > 0$ , but it is possible to have  $p' < 0$  and  $q' < 0$ . Therefore, for  $r' > 0$ ,  $\hat{E}$  is necessarily stable, while for  $r' < 0$ ,  $\hat{E}$  is necessarily unstable.

## 2.3 Simplified model: $n_1 = n_2 = n$

The analysis is simplified by setting  $n_1 = n_2 = n$ . For the dynamics, Equations (61) become

$$\begin{aligned}
 \alpha_1 \dot{x}_1 &= x_1 \left( \frac{y_1}{1 + my_1} \right) \left( \frac{y_2}{1 + ny_2} \right) - x_1 + u_1 \\
 \alpha_2 \dot{x}_2 &= cx_2 \left( \frac{y_2}{1 + ny_2} \right) - x_2 + u_2 \\
 \beta_1 \dot{y}_1 &= f_1 - y_1 - x_1 \left( \frac{y_1}{1 + my_1} \right) \left( \frac{y_2}{1 + ny_2} \right) - y_1 z \\
 \beta_2 \dot{y}_2 &= f_2 - y_2 - x_1 \left( \frac{y_1}{1 + my_1} \right) \left( \frac{y_2}{1 + ny_2} \right) - x_2 \left( \frac{y_2}{1 + ny_2} \right) \\
 \dot{z} &= ax_2 \left( \frac{y_2}{1 + ny_2} \right) - bz - y_1 z
 \end{aligned} \tag{77}$$

Equations (65) become

$$\begin{aligned}
 x_1^{(1)} &= \frac{(f_1 + f_2)(1 - mn) - m - n - \sqrt{[(f_1 - f_2)(1 - mn) + m - n]^2 + 4}}{2(1 - mn)} \\
 x_2^{(1)} &= 0 \\
 y_1^{(1)} &= \frac{(f_1 - f_2)(1 - mn) + m + n + \sqrt{[(f_1 - f_2)(1 - mn) + m - n]^2 + 4}}{2(1 - mn)} \\
 y_2^{(1)} &= \frac{(f_2 - f_1)(1 - mn) + m + n + \sqrt{[(f_1 - f_2)(1 - mn) + m - n]^2 + 4}}{2(1 - mn)} \\
 z^{(1)} &= 0
 \end{aligned} \tag{78}$$

Equilibrium  $E_1$  is given by Equations (78).

Equations (67) become

$$\begin{aligned}
x_1^{(2)} &= 0 \\
x_2^{(2)} &= \frac{c[f_2(c-n) - 1]}{c-n} \\
y_1^{(2)} &= \frac{1}{2(c-n)} \left[ (c-n)(f_1 - b) - a[(c-n)f_2 - 1] \right. \\
&\quad \left. + \sqrt{\{(c-n)(f_1 - b) - a[(c-n)f_2 - 1]\}^2 + 4b(c-n)^2 f_1} \right] \\
y_2^{(2)} &= \frac{1}{c-n} \\
z^{(2)} &= \frac{1}{2b(c-n)} \left[ a[(c-n)f_2 - 1] - (c-n)(f_1 + b) \right. \\
&\quad \left. + \sqrt{\{(c-n)(f_1 - b) - a[(c-n)f_2 - 1]\}^2 + 4b(c-n)^2 f_1} \right]
\end{aligned} \tag{79}$$

Equilibrium  $E_2$  is given by Equations (79).

Equation (69) becomes

$$p' = (c-n)[c - (f_1 - f_2)(1 - mc)] - (1 - mc) \tag{80}$$

Equation (70) becomes

$$q' = [b(1 - mc) + c][f_1(1 - mc) - c](c-n) - a[(c-n)f_2 - 1](1 - mc)c \tag{81}$$

Equation (71) becomes

$$r' = b(1 - mc) - c(a - 1) \tag{82}$$

Equations (72) become

$$\begin{aligned}
\hat{x}_1 &= \left( \frac{1}{(c-n)(1 - mc)} \right) \left( \frac{q'}{r'} \right) \\
\hat{x}_2 &= \left( \frac{c[b(1 - mc) + c]}{(c-n)(1 - mc)} \right) \left( \frac{p'}{r'} \right) \\
\hat{y}_1 &= \frac{c}{1 - mc} \\
\hat{y}_2 &= \frac{1}{c-n} \\
\hat{z} &= \left( \frac{a}{c-n} \right) \left( \frac{p'}{r'} \right)
\end{aligned} \tag{83}$$

Equilibrium  $\hat{E}$  is given by Equations (83), (80), (81), and (82).

### 2.3.1 Effects of $m$ and $n$ on the GOE

Bounds on the bacterial growth rates do not change the roles of  $f_1$  and  $f_2$  in triggering a GOE. Similarly to  $p$ ,  $p'$  only depends on the difference  $f_1 - f_2$ . Therefore, the difference  $f_1 - f_2$  determines when the GOE is initiated.

In **Fig. S14(a)**,  $f_1^* - f_2$  is plotted versus  $c$  for  $n = 0$  and for different values of  $m$ . For  $c \ll 1/m$ ,  $m$  does not significantly change the condition for initiating a GOE. For larger values of  $c$ , the value of  $f_1^* - f_2$  is augmented compared with the case  $m = 0$ . If  $c > 1/m$ , then the fixed point for which APB dominate is necessarily unstable. In **Fig. S14(b)**,  $f_1^* - f_2$  is plotted versus  $c$  for  $m = 0$  and for different values of  $n$ . For  $c \gg n$ ,  $n$  does not significantly change the condition for initiating a GOE. For smaller values of  $c$ , the value of  $f_1^* - f_2$  is reduced compared with the case  $n = 0$ . If  $c < n$ , then the fixed point for which APB dominate is necessarily stable.

For nonzero values of  $m$  and  $n$ , the GOE can be continuous or discontinuous. **Fig. S15** shows a continuous transition, and **Fig. S16** shows a discontinuous transition.

### 3 Supplementary Note 3: Dynamics of organic carbon

When APB and cyanobacteria die, they leave behind organic matter. The carbon in this organic matter can be buried in sediments and thereby removed from the system. Another possibility is that organic carbon reacts with oxygen in the atmosphere. To understand how aerobic decomposition of organic carbon affects the GOE, we consider the following equations:

$$\begin{aligned}
 \frac{dX_1}{dT} &= C_1 X_1 Y_1 Y_2 - D_1 X_1 + U_1 \\
 \frac{dX_2}{dT} &= C_2 X_2 Y_2 - D_2 X_2 + U_2 \\
 \frac{dY_1}{dT} &= F_1 - G_1 Y_1 - H X_1 Y_1 Y_2 - R_1 Y_1 Z \\
 \frac{dY_2}{dT} &= F_2 - G_2 Y_2 - H_1 X_1 Y_1 Y_2 - H_2 X_2 Y_2 \\
 \frac{dZ}{dT} &= A X_2 Y_2 - B Z - R Y_1 Z - E W Z \\
 \frac{dW}{dT} &= J_1 X_1 + J_2 X_2 - S W - V W Z
 \end{aligned} \tag{84}$$

In Equations (84),  $W$  is organic carbon. Organic carbon is produced when APB die at rate  $J_1 X_1$  and when cyanobacteria die at rate  $J_2 X_2$ . Organic carbon is removed via reaction with dioxygen at rate  $V W Z$ , and dioxygen is correspondingly removed at rate  $E W Z$ . Organic carbon is removed by other means at rate  $S W$ .

Equations (84) can be rewritten as

$$\begin{aligned}
\left(\frac{1}{D_1}\right) \frac{d}{dT} \left(\frac{kHX_1}{G_1}\right) &= \left(\frac{kHX_1}{G_1}\right) \left(\frac{kC_1Y_1}{D_1}\right) \left(\frac{Y_2}{k}\right) - \frac{kHX_1}{G_1} + \frac{kHU_1}{D_1G_1} \\
\left(\frac{1}{D_2}\right) \frac{d}{dT} \left(\frac{H_2X_2}{G_2}\right) &= \left(\frac{kC_2}{D_2}\right) \left(\frac{H_2X_2}{G_2}\right) \left(\frac{Y_2}{k}\right) - \frac{H_2X_2}{G_2} + \frac{H_2U_2}{D_2G_2} \\
\left(\frac{1}{G_1}\right) \frac{d}{dT} \left(\frac{kC_1Y_1}{D_1}\right) &= \frac{kC_1F_1}{D_1G_1} - \frac{kC_1Y_1}{D_1} \\
&\quad - \left(\frac{kHX_1}{G_1}\right) \left(\frac{kC_1Y_1}{D_1}\right) \left(\frac{Y_2}{k}\right) - \left(\frac{kC_1Y_1}{D_1}\right) \left(\frac{R_1Z}{G_1}\right) \\
\left(\frac{1}{G_2}\right) \frac{d}{dT} \left(\frac{Y_2}{k}\right) &= \frac{F_2}{kG_2} - \frac{Y_2}{k} \\
&\quad - \left(\frac{kHX_1}{G_1}\right) \left(\frac{kC_1Y_1}{D_1}\right) \left(\frac{Y_2}{k}\right) - \left(\frac{H_2X_2}{G_2}\right) \left(\frac{Y_2}{k}\right) \\
\left(\frac{kC_1}{D_1R}\right) \frac{d}{dT} \left(\frac{R_1Z}{G_1}\right) &= \left(\frac{k^2AC_1G_2R_1}{D_1G_1H_2R}\right) \left(\frac{H_2X_2}{G_2}\right) \left(\frac{Y_2}{k}\right) \\
&\quad - \left(\frac{kBC_1}{D_1R}\right) \left(\frac{R_1Z}{G_1}\right) - \left(\frac{kC_1Y_1}{D_1}\right) \left(\frac{R_1Z}{G_1}\right) \\
&\quad - \left(\frac{kC_1EW}{D_1R}\right) \left(\frac{R_1Z}{G_1}\right) \\
\left(\frac{R_1}{G_1V}\right) \frac{d}{dT} \left(\frac{kC_1EW}{D_1R}\right) &= \left(\frac{C_1EJ_1R_1}{D_1HRV}\right) \left(\frac{kHX_1}{G_1}\right) + \left(\frac{kC_1EG_2J_2R_1}{D_1G_1H_2RV}\right) \left(\frac{H_2X_2}{G_2}\right) \\
&\quad - \left(\frac{R_1S}{G_1V}\right) \left(\frac{kC_1EW}{D_1R}\right) \\
&\quad - \left(\frac{kC_1EW}{D_1R}\right) \left(\frac{R_1Z}{G_1}\right)
\end{aligned} \tag{85}$$

To simplify Equations (85), we make the following definitions:

$$\begin{aligned}
j_1 &\equiv \frac{C_1EJ_1R_1}{D_1HRV} \\
j_2 &\equiv \frac{kC_1EG_2J_2R_1}{D_1G_1H_2RV} \\
s &\equiv \frac{R_1S}{G_1V} \\
w &\equiv \frac{kC_1EW}{D_1R}
\end{aligned} \tag{86}$$

We also define

$$\Omega \equiv \frac{R_1}{\gamma G_1V} \tag{87}$$

Substituting Equations (6), (7), (86), and (87) into Equations (85), we obtain

$$\begin{aligned}
\alpha_1 \dot{x}_1 &= x_1 y_1 y_2 - x_1 + u_1 \\
\alpha_2 \dot{x}_2 &= c x_2 y_2 - x_2 + u_2 \\
\beta_1 \dot{y}_1 &= f_1 - y_1 - x_1 y_1 y_2 - y_1 z \\
\beta_2 \dot{y}_2 &= f_2 - y_2 - x_1 y_1 y_2 - x_2 y_2 \\
\dot{z} &= a x_2 y_2 - b z - y_1 z - w z \\
\Omega \dot{w} &= j_1 x_1 + j_2 x_2 - s w - w z
\end{aligned} \tag{88}$$

Equations (88) describe, without loss of generality, the ecological dynamics with organic carbon.

The fixed points of the ecological dynamics are obtained from the steady state of Equations (88):

$$\begin{aligned}
0 &= \bar{x}_1 \bar{y}_1 \bar{y}_2 - \bar{x}_1 + u_1 \\
0 &= c \bar{x}_2 \bar{y}_2 - \bar{x}_2 + u_2 \\
0 &= f_1 - \bar{y}_1 - \bar{x}_1 \bar{y}_1 \bar{y}_2 - \bar{y}_1 \bar{z} \\
0 &= f_2 - \bar{y}_2 - \bar{x}_1 \bar{y}_1 \bar{y}_2 - \bar{x}_2 \bar{y}_2 \\
0 &= a \bar{x}_2 \bar{y}_2 - b \bar{z} - \bar{y}_1 \bar{z} - \bar{w} \bar{z} \\
0 &= j_1 \bar{x}_1 + j_2 \bar{x}_2 - s \bar{w} - \bar{w} \bar{z}
\end{aligned} \tag{89}$$

Setting  $u_1 = u_2 = 0$  in Equations (89), we have

$$\begin{aligned}
0 &= (\bar{y}_1 \bar{y}_2 - 1) \bar{x}_1 \\
0 &= (c \bar{y}_2 - 1) \bar{x}_2 \\
0 &= f_1 - \bar{y}_1 - \bar{x}_1 \bar{y}_1 \bar{y}_2 - \bar{y}_1 \bar{z} \\
0 &= f_2 - \bar{y}_2 - \bar{x}_1 \bar{y}_1 \bar{y}_2 - \bar{x}_2 \bar{y}_2 \\
0 &= a \bar{x}_2 \bar{y}_2 - b \bar{z} - \bar{y}_1 \bar{z} - \bar{w} \bar{z} \\
0 &= j_1 \bar{x}_1 + j_2 \bar{x}_2 - s \bar{w} - \bar{w} \bar{z}
\end{aligned} \tag{90}$$

For Equilibrium  $E_1$ ,  $x_2^{(1)} = z^{(1)} = 0$ . Thus, from Equation (22),  $p$  is sufficient to characterize the dynamical stability of  $E_1$ :

- If  $p < 0$ , then  $E_1$  is dynamically stable.
- If  $p > 0$ , then  $E_1$  is dynamically unstable.

To determine the dynamical stability of Equilibrium  $E_2$ , we consider Equilibrium  $\hat{E}$  in the limit that  $\hat{x}_1$  is arbitrarily small. From Equations (90), Equilibrium  $\hat{E}$  is given by

$$\begin{aligned}
0 &= \hat{y}_1 \hat{y}_2 - 1 \\
0 &= c \hat{y}_2 - 1 \\
0 &= f_1 - \hat{y}_1 - \hat{x}_1 \hat{y}_1 \hat{y}_2 - \hat{y}_1 \hat{z} \\
0 &= f_2 - \hat{y}_2 - \hat{x}_1 \hat{y}_1 \hat{y}_2 - \hat{x}_2 \hat{y}_2 \\
0 &= a \hat{x}_2 \hat{y}_2 - b \hat{z} - \hat{y}_1 \hat{z} - \hat{w} \hat{z} \\
0 &= j_1 \hat{x}_1 + j_2 \hat{x}_2 - s \hat{w} - \hat{w} \hat{z}
\end{aligned} \tag{91}$$

Setting  $\hat{x}_1 = 0$  in Equations (91), we have

$$\begin{aligned}
0 &= \hat{y}_1^{(2)} \hat{y}_2^{(2)} - 1 \\
0 &= c \hat{y}_2^{(2)} - 1 \\
0 &= f_1 - \hat{y}_1^{(2)} - \hat{y}_1^{(2)} \hat{z}^{(2)} \\
0 &= f_2 - \hat{y}_2^{(2)} - \hat{x}_2^{(2)} \hat{y}_2^{(2)} \\
0 &= a \hat{x}_2^{(2)} \hat{y}_2^{(2)} - b \hat{z}^{(2)} - \hat{y}_1^{(2)} \hat{z}^{(2)} - \hat{w}^{(2)} \hat{z}^{(2)} \\
0 &= j_2 \hat{x}_2^{(2)} - s \hat{w}^{(2)} - \hat{w}^{(2)} \hat{z}^{(2)}
\end{aligned} \tag{92}$$

Using  $q$  from Equation (23), we define

$$\tilde{q} = q[f_1 - c(1 - s)] + j_2 c(c f_2 - 1)(f_1 - c) \tag{93}$$

Eliminating  $\hat{x}_2^{(2)}$ ,  $\hat{y}_1^{(2)}$ ,  $\hat{y}_2^{(2)}$ ,  $\hat{z}^{(2)}$ , and  $\hat{w}^{(2)}$  from Equations (92), we obtain  $\tilde{q} = 0$ . This indicates that, if  $f_1 > c$ , then  $\tilde{q}$  from Equation (93) is sufficient to characterize the dynamical stability of  $E_2$ . We have the following conditions:

- If  $f_1 < c$ , or if  $f_1 > c$  and  $\tilde{q} < 0$ , then  $E_2$  is dynamically stable.
- If  $f_1 > c$  and  $\tilde{q} > 0$ , then  $E_2$  is dynamically unstable.

We can further determine how organic carbon affects the duration of the GOE. Using  $r$  from Equation (24), we define

$$\tilde{r} = r + \frac{j_2 c^2 (c f_2 - 1)}{s c^2 + c f_2 - 1} \tag{94}$$

Considering that  $f_1 > c$ , the solution to  $p = 0$  and  $\tilde{q} = 0$  is that  $\tilde{r} = 0$ . This indicates that  $\tilde{r}$  from Equation (94) determines whether the GOE is gradual or sudden:

- If  $\tilde{r} > 0$ , then the transition is gradual.
- If  $\tilde{r} < 0$ , then the transition is sudden.

### 3.1 Effects of $s$ on the GOE

The parameter  $s$  is the rate of burial of organic carbon. If organic carbon is immediately buried in sediments, then  $s$  is arbitrarily large, and organic carbon has no effect on the GOE. For finite values of  $s$ , some organic carbon reacts with oxygen during aerobic decomposition, thereby removing oxygen from the atmosphere. Organic carbon thus represents one of many potential sinks for oxygen. Since  $p$  is independent of sinks for oxygen, the rate of burial of organic carbon is not a central consideration for determining when the GOE begins. It can, however, affect the duration of the GOE.

**Fig. S17(a)** shows a continuous transition for a decreasing value of  $f_1$  and for a finite value of  $s$ . In **Fig. S17(b)**, the value of  $s$  is increased, and the transition is instead discontinuous. In both cases, oxygen levels rise substantially around time  $t = t^*$ .
